# Supplementary material for: Association between COVID-19 outcomes and mask mandates, adherence, and attitudes
Source: PubMed Central journal article supplement (PMC8221503; doi:10.1371/journal.pone.0252315), 2021-06-23
Supplement: pone.0252315.s001.pdf [file pone.0252315.s001.pdf]

# S1 File

## A.1 Characteristics of COVID-19 outcome and adherence data

|                                | Outcome                                               |                                                       |                                                              |                                                                                            |
|--------------------------------|-------------------------------------------------------|-------------------------------------------------------|--------------------------------------------------------------|--------------------------------------------------------------------------------------------|
|                                | New confirmed COVID-19 cases                          | New confirmed deaths due to COVID-19                  | % of new hospital admissions with COVID-associated diagnoses | % of people who wore a mask for most or all of the time while in public in the past 5 days |
| <b>Source</b>                  | Delphi COVIDcast Epidata API                          | Delphi COVIDcast Epidata API                          | Delphi COVIDcast Epidata API                                 | Delphi COVIDcast Epidata API                                                               |
| <b>Frequency</b>               | Daily                                                 | Daily                                                 | Daily                                                        | Daily                                                                                      |
| <b>Geographical Resolution</b> | State-level                                           | State-level                                           | State-level                                                  | State-level                                                                                |
| <b>Geographical Coverage</b>   | All States and D.C.                                   | All States and D.C.                                   | All States and D.C.                                          | Hawaii, Iowa, North Dakota, New Hampshire                                                  |
| <b>Date Range</b>              | Feb. 1 - Sep 27 2020                                  | Feb. 1 - Sep 27 2020                                  | Feb. 1 - Sep 27 2020                                         | Sep 8 - Nov 27, 2020                                                                       |
| <b>Smoothing</b>               | 7-day average signal                                  | 7-day average signal                                  | Systematic day-of-week effects removed                       | Seven day pooling                                                                          |
| <b>Adjusted</b>                | Per 100K population                                   | Per 100K population                                   | Per total admissions that day                                | Weighted to correct for a variety of biases                                                |
| <b>Normalization</b>           | Z-scored state-specific means and standard deviations | Z-scored state-specific means and standard deviations | Not Needed (already normalized as a percentage)              | Z-scored state-specific means and standard deviations                                      |

**S1 Table. Outcome data description.** Characteristics of COVID-19 outcome variables

For the proportion of daily hospitalization admissions due to COVID-19, admissions are coded as COVID-19 related if the admission code U071, U072, B9729, or if primary ICD-10 code is R05, R060, R509, Z9911, R0902, R0603, R0609, R062, R069, R0602, R05, R0600, J9691, J9692, J9621, J9690, J9601, J9600, J189, J22, J1289, J129, J1281, B9721, B9732, B342, B349, A419, R531 or R6889 and there is a secondary ICD-10 code of Z20828, or if the primary ICD-10 code is Z20828.

## A.2 Characteristics of COVID-19 control data

|                                   | Source                  | Freq. | Geograph. Resolution | Date Range        | Normalization                   |
|-----------------------------------|-------------------------|-------|----------------------|-------------------|---------------------------------|
| <b>Retail+recreation mobility</b> | Google Mobility Reports | Daily | State-level          | Feb 1-Sep 27 2020 | Median day of the week baseline |
| <b>Grocery+pharmacy mobility</b>  | Google Mobility Reports | Daily | State-level          | Feb 1-Sep 27 2020 | Median day of the week baseline |
| <b>Parks mobility</b>             | Google Mobility Reports | Daily | State-level          | Feb 1-Sep 27 2020 | Median day of the week baseline |
| <b>Transit stations mobility</b>  | Google Mobility Reports | Daily | State-level          | Feb 1-Sep 27 2020 | Median day of the week baseline |
| <b>Workplaces mobility</b>        | Google Mobility Reports | Daily | State-level          | Feb 1-Sep 27 2020 | Median day of the week baseline |
| <b>Residential mobility</b>       | Google Mobility Reports | Daily | State-level          | Feb 1-Sep 27 2020 | Median day of the week baseline |
| <b>Temperature</b>                | NOAA                    | Daily | State-level          | Feb 1-Sep 27 2020 | Avg daily temperature           |
| <b>Precipitation</b>              | NOAA                    | Daily | State-level          | Feb 1-Sep 27 2020 | Avg daily precipitation         |
| <b>Population Density</b>         | Oxford World in Data    | Daily | State-level          | Feb 1-Sep 27 2020 | Per square. km                  |
| <b>Human Develop. Index</b>       | Oxford World in Data    | Daily | Country-level        | Feb 1-Sep 27 2020 | Relative to UNDP limits         |
| <b>New Test Rate</b>              | COVID Tracking Project  | Daily | Country-level        | Feb 1-Sep 27 2020 | Per 100K population             |
| <b>Vaccination Rate</b>           | Oxford World in Data    | Daily | State-level          | Jan 1-Mar 30 2021 | Per 100 population              |

**S2 Table. Control data description.** Characteristics of control variables

### A.3 State-level Mask Mandates Dates

| State                | Public Mask Mandates | Business Mask Mandates | State Ended Mask Mandates |
|----------------------|----------------------|------------------------|---------------------------|
| Alabama              | 7/16/20              | 5/11/20                | -                         |
| Alaska               | 4/24/20              | 4/24/20                | 5/22/20                   |
| Arizona              | -                    | 5/8/20                 | 3/25/2021                 |
| Arkansas             | 7/20/20              | 5/11/20                | 3/30/2021                 |
| California           | 6/18/20              | 5/5/20                 | -                         |
| Colorado             | 7/16/20              | 4/23/20                | -                         |
| Connecticut          | 4/20/20              | 4/3/20                 | -                         |
| Delaware             | 4/28/20              | 5/1/20                 | -                         |
| District of Columbia | 4/17/20              | 4/15/20                | -                         |
| Florida              | -                    | 5/11/20                | -                         |
| Georgia              | -                    | 4/27/20                | -                         |
| Hawaii               | 11/16/20             | 4/16/20                | -                         |
| Idaho                | -                    | -                      | -                         |
| Illinois             | 5/1/20               | 5/1/20                 | -                         |
| Indiana              | 7/27/20              | 5/1/20                 | -                         |
| Iowa                 | -                    | 11/16/20               | 2/7/2021                  |
| Kansas               | 7/3/20               | 7/3/20                 | -                         |
| Kentucky             | 5/11/20              | 5/11/20                | -                         |
| Louisiana            | -                    | 5/1/20                 | -                         |
| Maine                | 5/1/20               | 5/1/20                 | -                         |
| Maryland             | 4/18/20              | 4/18/20                | -                         |
| Massachusetts        | 5/6/20               | 5/6/20                 | -                         |
| Michigan             | 4/27/20              | 4/26/20                | 10/2/2020                 |
| Minnesota            | 7/24/20              | 6/1/20                 | -                         |
| Mississippi          | 8/5/20               | 5/7/20                 | 9/30/20                   |
| Missouri             | -                    | -                      | -                         |
| Montana              | -                    | -                      | 2/12/2021                 |
| Nebraska             | -                    | 5/4/20                 | -                         |
| Nevada               | 6/26/20              | 5/9/20                 | -                         |
| New Hampshire        | 11/20/20             | 5/1/20                 | -                         |
| New Jersey           | 4/8/20               | 4/8/20                 | -                         |
| New Mexico           | 5/15/20              | 5/6/20                 | -                         |
| New York             | 4/17/20              | 4/17/20                | -                         |
| North Carolina       | 6/26/20              | 6/26/20                | -                         |
| North Dakota         | 11/14/20             | 4/28/20                | 1/18/2021                 |
| Ohio                 | 7/23/20              | 4/29/20                | -                         |
| Oklahoma             | -                    | -                      | -                         |
| Oregon               | 7/1/20               | 5/9/20                 | -                         |
| Pennsylvania         | 7/1/20               | 4/19/20                | -                         |
| Rhode Island         | 4/18/20              | 4/18/20                | -                         |
| South Carolina       | -                    | 8/3/20                 | -                         |
| South Dakota         | -                    | -                      | -                         |
| Tennessee            | -                    | -                      | -                         |
| Texas                | 7/3/20               | 5/8/20                 | 3/10/2021                 |
| Utah                 | 4/10/20              | 4/10/20                | 5/1/20                    |
| Vermont              | 8/1/20               | 4/17/20                | -                         |
| Virginia             | 5/29/20              | 5/29/20                | -                         |
| Washington           | 6/26/20              | 5/4/20                 | -                         |
| West Virginia        | 7/7/20               | 5/4/20                 | -                         |
| Wisconsin            | 8/1/20               | 8/1/20                 | 3/31/2021                 |
| Wyoming              | -                    | 5/1/20                 | 3/16/2021                 |

**S3 Table. Mandate data description.** Mask mandate start and end dates as of March 30, 2021

## A.4 Comparing controlling for outcome delay and growth

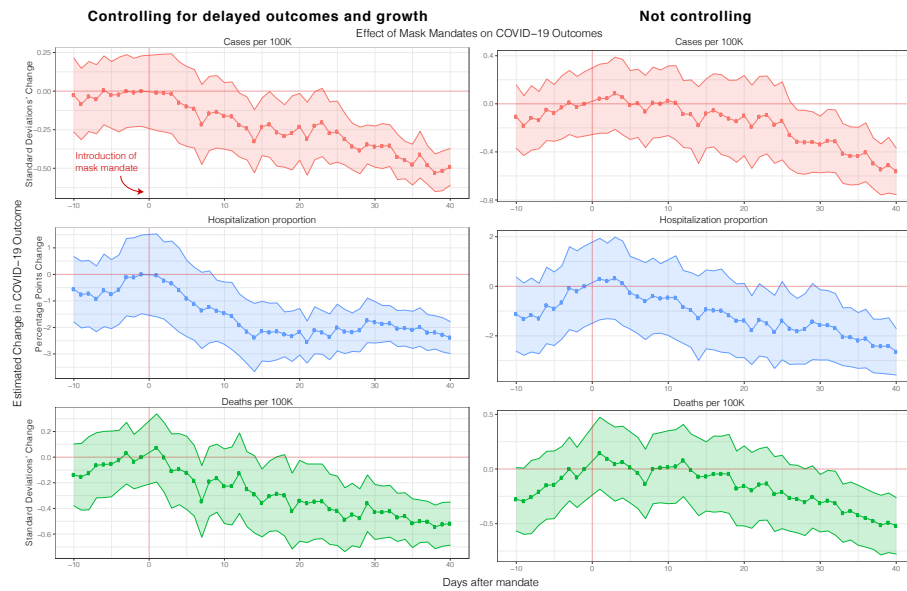

**S1 Fig. Delay robustness check.** Robustness check of main event study results (section fig. 1) where we compare controlling for past outcome values (with a delay of 14 days) and growth rates as a way to minimize confounding due to peoples private behavioral changes to COVID-19 [35]. As can be see in the figure, the overall trajectory and magnitude of the treatment effect is consistent with our previous main result. Full regression results are shown in S8 Table

## A.5 Testing rate

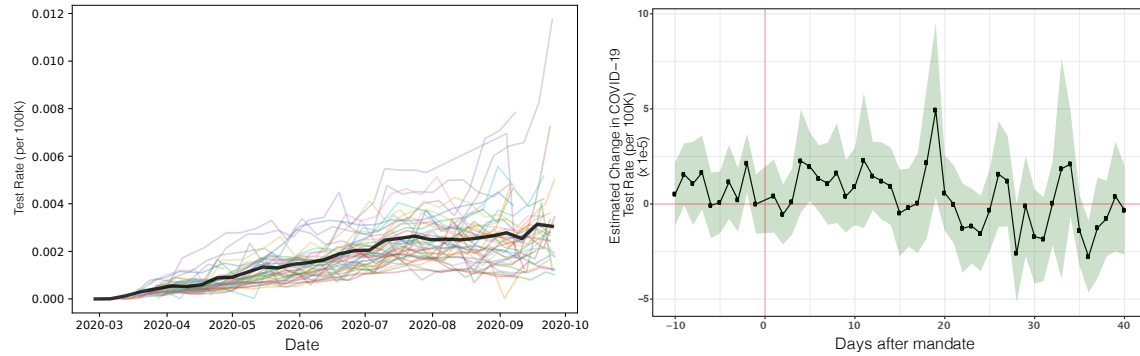

**S2 Fig. Testing rate robustness check.** **Left:** Per state (each state a different color) and average (over all states, thicker black line) testing rate increased during our period of investigation. **Right:** Event study of testing rate over all states controlling for a number of factors showing that mask mandates are not associated with changes in testing rate during our period of investigation. This suggests that testing rate decreases are not behind the decrease in COVID-19 outcomes we observe after the introduction of mask mandates. Full regression results are shown in S13 Table.

## A.6 County-level heterogeneity

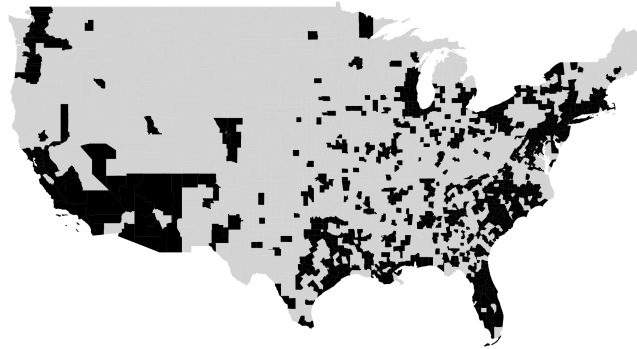

**S3 Fig. County map.** Map showing the 857 counties for which we have outcome and control variable data. Missing counties either had too few cases (and therefore cannot be reported for privacy reasons) or had data available later than the end of a mask mandate ended. The counties we have data for contain 77% of the US population (as per the 2018 US Census).

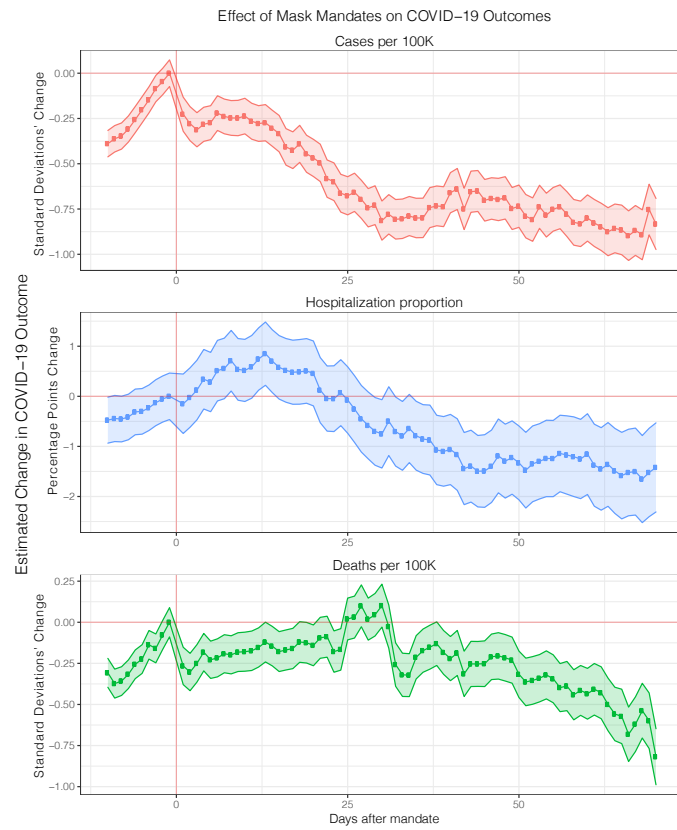

**S4 Fig. County-level robustness check.** Robustness check of main event study results (section Fig 1) where we focus on county level mandates only. Full regression results are shown in S11 Table.

## A.7 Pre-trends

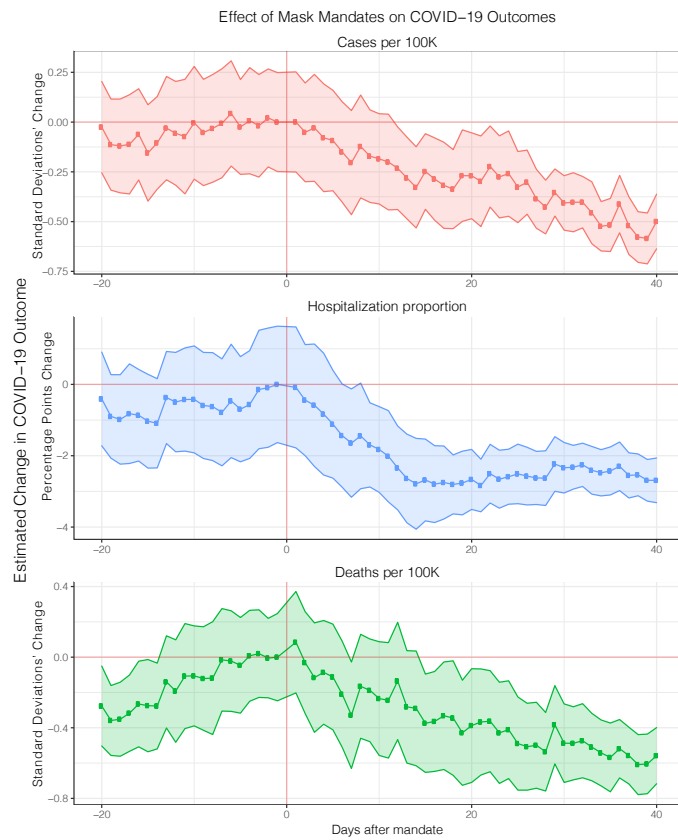

**S5 Fig. Pre-trends robustness check.** Robustness check of main event study results (section Fig 1) where we investigate longer pre-treatment windows and no fixed effect.

## A.8 Controlling for confirmed cases

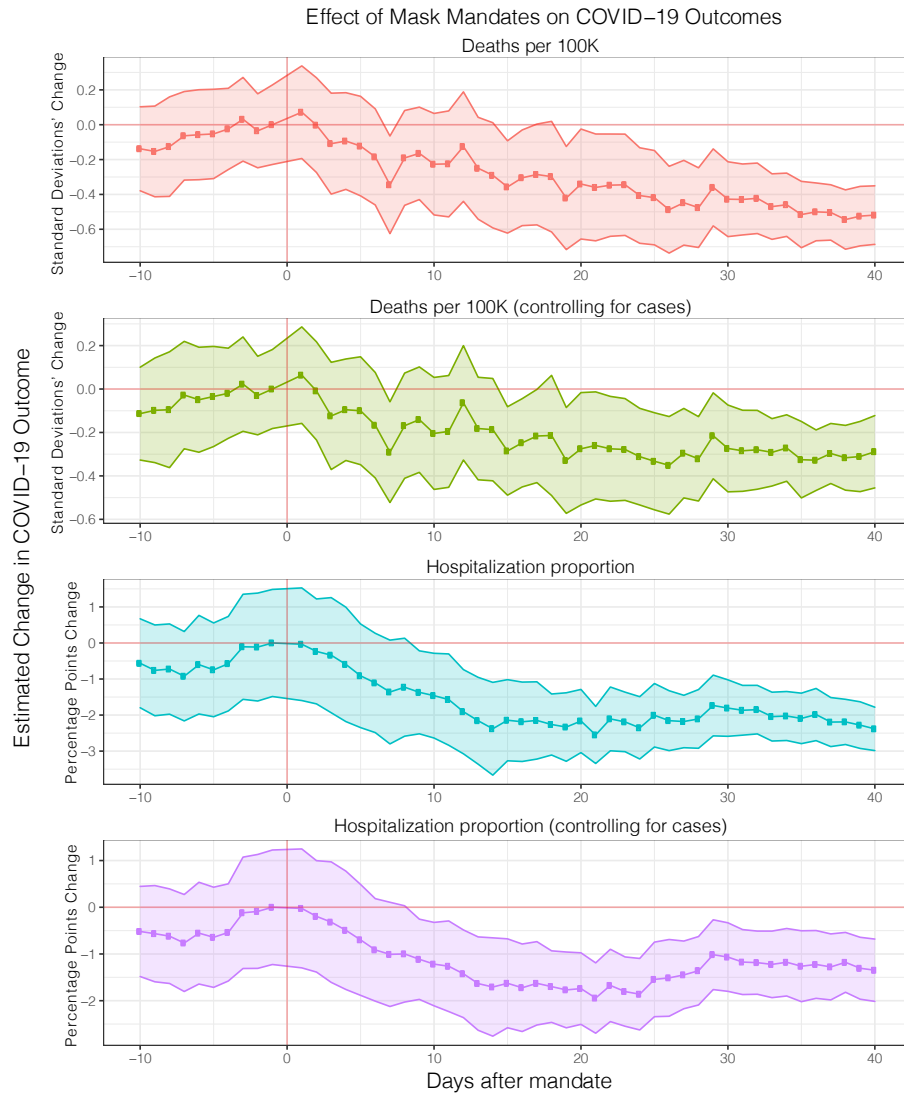

**S6 Fig. Controlling cases robustness check.** Robustness check of main event study results (section Fig 1) where we compare the effect of mask mandates on deaths and hospitalization with and without controlling for cases. Because the trajectory and magnitude of the treatment effect is consistent with our previous main result under either specification (with and without controlling for cases), this demonstrates that our main result is not sensitive to whether we account for the cases underlying the more severe outcomes. Full regression results are shown in S7 Table.



## A.9 Mask adherence following mask mandate introduction

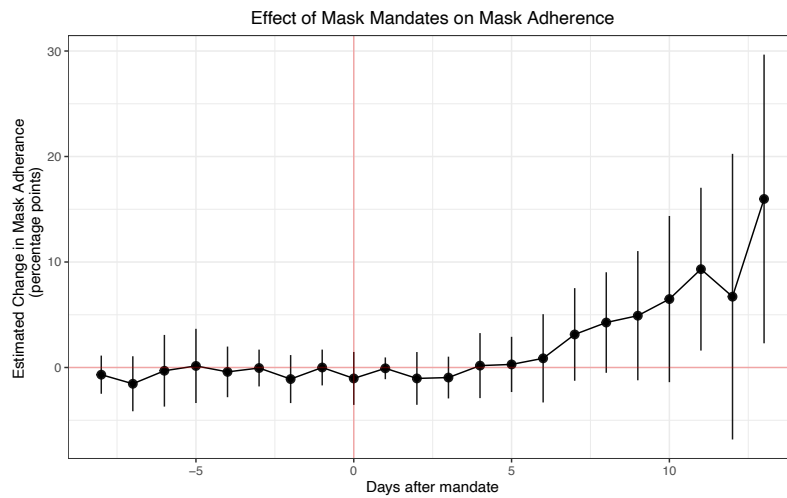

**S7 Fig. Adherence introducing mandates robustness check.** Event study of mask mandate introduction when not controlling for cases, deaths and testing rate. As expected, the treatment effect becomes noisier but remains consistent to when controlling for cases, deaths and testing rate. Full regression results are shown in S14 [Table](#).

## A.10 Mask adherence following mask mandate lifting

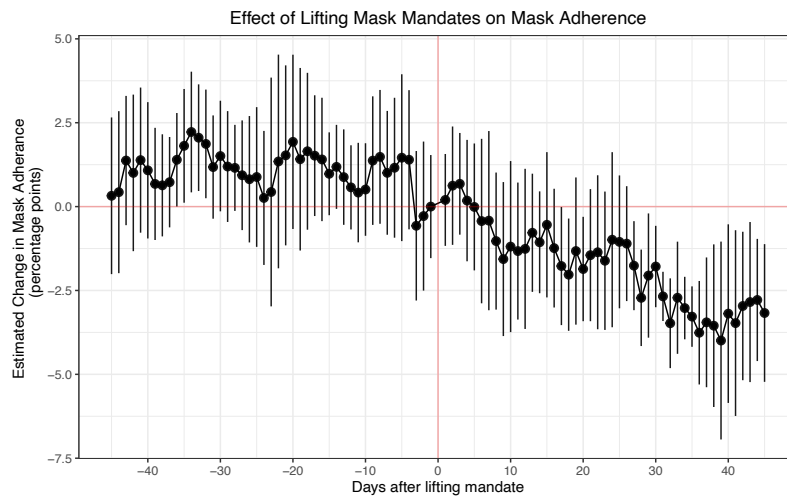

**S8 Fig. Adherence lifting mandates robustness check.** Event study of mask mandate lifting when not controlling for cases, deaths and testing rate. Full regression results are shown in S15 [Table](#).

## A.11 International Community Mask Adherence and Attitudes

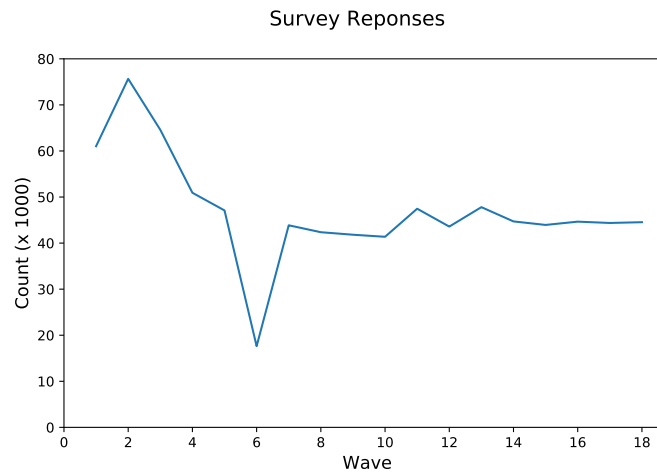

**S9 Fig. Survey response counts.** Number of responses per wave of survey.

Weighted Average of Community Mask Adherence

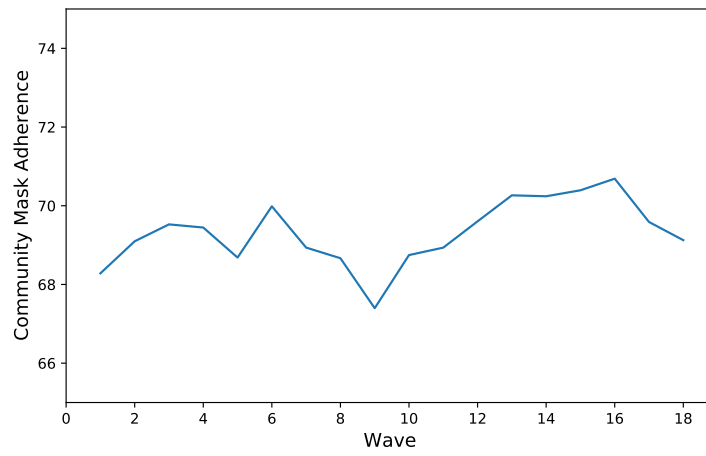

S10 Fig. Survey average adherence. Average (weighted) community mask adherence response per wave.

Weighted Average of Community Mask Attitudes

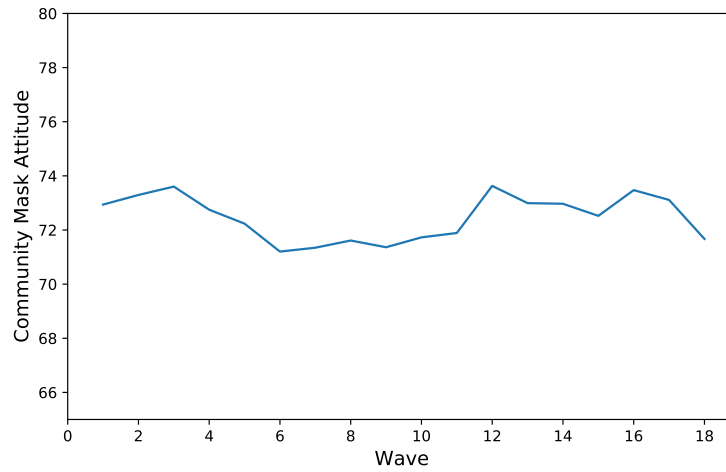

S11 Fig. Survey average attitudes. Average (weighted) community mask attitude response per wave.

---

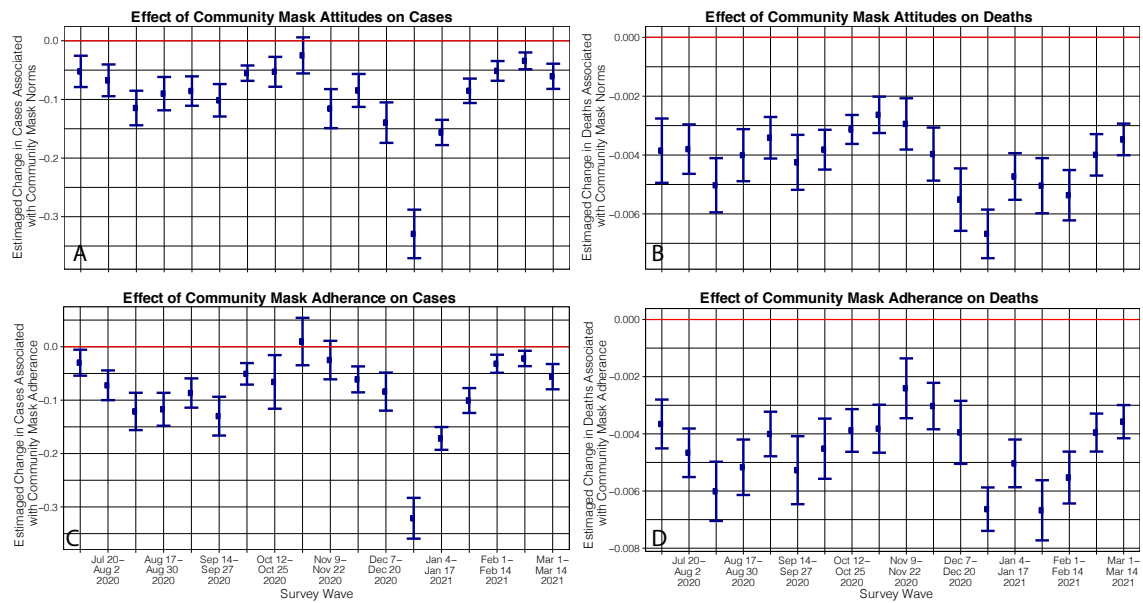

**S12 Fig. Individual waves robustness check.** Dis-aggregated (by survey wave) estimates of the effect of community mask attitudes on COVID-19 cases (**A**) and deaths (**B**), and community mask adherence on COVID-19 cases (**C**) and deaths (**D**) in a 68-country survey with 479K responses. Error bars show a 95% confidence interval. Full regression statistics are shown in S18, S19, S20 and S21 Tables.

## A.12 Event study and multi-linear regression tables

**S4 Table. Regression table.** Event Study regression summary statistics for main result (section fig. 1)

|                        | <i>Dependent variable:</i> |                      |                        |
|------------------------|----------------------------|----------------------|------------------------|
|                        | confirmed cases            | deaths               | hospitalization        |
|                        | (1)                        | (2)                  | (3)                    |
| confirmed cases delay  | 0.483***<br>(0.025)        |                      |                        |
| confirmed cases growth | -0.00000<br>(0.00002)      |                      |                        |
| deaths delay           |                            | 0.507***<br>(0.031)  |                        |
| deaths growth          |                            | 0.001***<br>(0.0002) |                        |
| hospitalization delay  |                            |                      | 0.549***<br>(0.027)    |
| hospitalization growth |                            |                      | 0.109***<br>(0.032)    |
| new test rate          | 56.176***<br>(14.681)      | 27.940**<br>(10.586) | 154.787***<br>(43.311) |
| precipitation          | -0.001<br>(0.001)          | -0.004***<br>(0.001) | 0.002<br>(0.006)       |
| temperature            | 0.016***<br>(0.003)        | 0.002<br>(0.004)     | 0.055***<br>(0.015)    |
| retail and recreation  | -7.824***<br>(1.796)       | -2.338<br>(1.539)    | -35.993***<br>(11.299) |
| grocery and pharmacy   | 5.833**<br>(2.306)         | -0.025<br>(2.015)    | 12.745<br>(14.192)     |
| parks                  | 0.388***<br>(0.096)        | 0.259***<br>(0.074)  | 1.210***<br>(0.319)    |
| transit stations       | -1.211**                   | 0.007                | -4.089*                |

|                               |                       |                        |                         |
|-------------------------------|-----------------------|------------------------|-------------------------|
|                               | (0.509)               | (0.423)                | (2.081)                 |
| workplaces                    | 1.490*<br>(0.816)     | 2.085***<br>(0.704)    | 10.502***<br>(3.450)    |
| residential                   | -43.630***<br>(7.292) | -29.042***<br>(7.774)  | -279.358***<br>(52.035) |
| grocery and pharmacy squared  | -2.864***<br>(1.065)  | -0.308<br>(0.916)      | -5.955<br>(6.241)       |
| retail and recreation squared | 3.560***<br>(1.011)   | 0.390<br>(0.860)       | 16.584***<br>(5.968)    |
| parks squared                 | -0.086***<br>(0.019)  | -0.041**<br>(0.016)    | -0.233***<br>(0.064)    |
| transit stations squared      | 0.959***<br>(0.342)   | 0.168<br>(0.241)       | 2.857**<br>(1.187)      |
| workplaces squared            | -1.461**<br>(0.553)   | -1.463***<br>(0.512)   | -9.818***<br>(2.276)    |
| residential squared           | 20.728***<br>(3.180)  | 14.635***<br>(3.471)   | 129.688***<br>(23.620)  |
| stay-at-home day              | 0.0001**<br>(0.00003) | 0.0001**<br>(0.00003)  | -0.00000<br>(0.0001)    |
| business closure day          | 0.0001*<br>(0.00003)  | 0.0001***<br>(0.00003) | -0.00001<br>(0.0001)    |
| day -10                       | 0.373***<br>(0.122)   | 0.478***<br>(0.123)    | 1.732***<br>(0.629)     |
| day -9                        | 0.316**<br>(0.118)    | 0.463***<br>(0.133)    | 1.534**<br>(0.642)      |
| day -8                        | 0.365***<br>(0.116)   | 0.491***<br>(0.146)    | 1.571**<br>(0.639)      |
| day -7                        | 0.347***<br>(0.114)   | 0.553***<br>(0.130)    | 1.372**<br>(0.632)      |
| day -6                        | 0.405***<br>(0.114)   | 0.559***<br>(0.132)    | 1.693**<br>(0.698)      |

---

|        |                     |                     |                     |
|--------|---------------------|---------------------|---------------------|
| day -5 | 0.375***<br>(0.110) | 0.564***<br>(0.131) | 1.549**<br>(0.664)  |
| day -4 | 0.377***<br>(0.123) | 0.592***<br>(0.119) | 1.720**<br>(0.669)  |
| day -3 | 0.399***<br>(0.121) | 0.648***<br>(0.123) | 2.189***<br>(0.744) |
| day -2 | 0.391***<br>(0.113) | 0.582***<br>(0.108) | 2.181***<br>(0.764) |
| day -1 | 0.400***<br>(0.117) | 0.617***<br>(0.116) | 2.294***<br>(0.758) |
| day 1  | 0.389***<br>(0.125) | 0.688***<br>(0.136) | 2.260***<br>(0.797) |
| day 2  | 0.387***<br>(0.129) | 0.614***<br>(0.139) | 2.060***<br>(0.743) |
| day 3  | 0.382***<br>(0.132) | 0.508***<br>(0.148) | 1.956**<br>(0.815)  |
| day 4  | 0.325**<br>(0.135)  | 0.523***<br>(0.142) | 1.701**<br>(0.810)  |
| day 5  | 0.300**<br>(0.132)  | 0.494***<br>(0.146) | 1.384*<br>(0.733)   |
| day 6  | 0.285**<br>(0.130)  | 0.432***<br>(0.141) | 1.186*<br>(0.703)   |
| day 7  | 0.184<br>(0.132)    | 0.272*<br>(0.143)   | 0.934<br>(0.734)    |
| day 8  | 0.255**<br>(0.122)  | 0.426***<br>(0.139) | 1.068<br>(0.693)    |
| day 9  | 0.265**<br>(0.120)  | 0.452***<br>(0.135) | 0.925<br>(0.587)    |
| day 10 | 0.239**<br>(0.110)  | 0.390**<br>(0.149)  | 0.833<br>(0.600)    |

---

|        |                    |                     |                   |
|--------|--------------------|---------------------|-------------------|
| day 11 | 0.236**<br>(0.114) | 0.392**<br>(0.155)  | 0.724<br>(0.646)  |
| day 12 | 0.180*<br>(0.106)  | 0.491***<br>(0.160) | 0.388<br>(0.596)  |
| day 13 | 0.158<br>(0.104)   | 0.367**<br>(0.149)  | 0.137<br>(0.615)  |
| day 14 | 0.075<br>(0.104)   | 0.326**<br>(0.154)  | -0.085<br>(0.657) |
| day 15 | 0.168*<br>(0.095)  | 0.259*<br>(0.135)   | 0.152<br>(0.574)  |
| day 16 | 0.184*<br>(0.109)  | 0.312**<br>(0.140)  | 0.108<br>(0.562)  |
| day 17 | 0.132<br>(0.112)   | 0.331**<br>(0.148)  | 0.146<br>(0.547)  |
| day 18 | 0.109<br>(0.103)   | 0.318*<br>(0.162)   | 0.033<br>(0.432)  |
| day 19 | 0.129<br>(0.122)   | 0.196<br>(0.151)    | -0.038<br>(0.485) |
| day 20 | 0.168<br>(0.110)   | 0.276*<br>(0.161)   | 0.130<br>(0.447)  |
| day 21 | 0.091<br>(0.121)   | 0.257<br>(0.156)    | -0.257<br>(0.404) |
| day 22 | 0.175<br>(0.113)   | 0.270*<br>(0.150)   | 0.188<br>(0.451)  |
| day 23 | 0.197*<br>(0.113)  | 0.272*<br>(0.148)   | 0.104<br>(0.421)  |
| day 24 | 0.127<br>(0.103)   | 0.210<br>(0.140)    | -0.060<br>(0.441) |
| day 25 | 0.137<br>(0.101)   | 0.198<br>(0.138)    | 0.289<br>(0.449)  |
| day 26 | 0.088              | 0.129               | 0.139             |

---



|          |                      |                      |                        |
|----------|----------------------|----------------------|------------------------|
|          | (0.085)              | (0.127)              | (0.424)                |
| day 27   | 0.041<br>(0.077)     | 0.169<br>(0.124)     | 0.116<br>(0.371)       |
| day 28   | 0.015<br>(0.077)     | 0.141<br>(0.117)     | 0.188<br>(0.415)       |
| day 29   | 0.054<br>(0.064)     | 0.257**<br>(0.113)   | 0.560<br>(0.430)       |
| day 30   | 0.040<br>(0.068)     | 0.189*<br>(0.110)    | 0.489<br>(0.400)       |
| day 31   | 0.044<br>(0.074)     | 0.187*<br>(0.104)    | 0.428<br>(0.352)       |
| day 32   | 0.046<br>(0.069)     | 0.194*<br>(0.103)    | 0.445<br>(0.344)       |
| day 33   | -0.027<br>(0.075)    | 0.147<br>(0.096)     | 0.252<br>(0.346)       |
| day 34   | -0.047<br>(0.062)    | 0.157*<br>(0.093)    | 0.268<br>(0.347)       |
| day 35   | -0.076<br>(0.068)    | 0.101<br>(0.097)     | 0.202<br>(0.357)       |
| day 36   | -0.012<br>(0.077)    | 0.116<br>(0.085)     | 0.309<br>(0.369)       |
| day 37   | -0.080<br>(0.064)    | 0.113<br>(0.081)     | 0.100<br>(0.347)       |
| day 38   | -0.130**<br>(0.062)  | 0.072<br>(0.087)     | 0.105<br>(0.320)       |
| day 39   | -0.117*<br>(0.066)   | 0.092<br>(0.087)     | 0.016<br>(0.330)       |
| day 40   | -0.092<br>(0.061)    | 0.098<br>(0.086)     | -0.089<br>(0.307)      |
| Constant | 21.774***<br>(4.579) | 13.914***<br>(4.614) | 157.262***<br>(31.907) |

---

---

|                                 |        |        |        |
|---------------------------------|--------|--------|--------|
| Observations                    | 10,078 | 10,078 | 10,078 |
| R <sup>2</sup>                  | 0.636  | 0.543  | 0.702  |
| Adjusted R <sup>2</sup>         | 0.632  | 0.537  | 0.698  |
| Residual Std. Error (df = 9956) | 0.606  | 0.678  | 2.675  |

---

*Note:*

\*p<0.1; \*\*p<0.05; \*\*\*p<0.01

**S5 Table. Regression table.** Event Study regression summary statistics for robustness check (fig. 2) where we only consider mask mandates that require the public to wear masks.

|                        | <i>Dependent variable:</i> |                       |                        |
|------------------------|----------------------------|-----------------------|------------------------|
|                        | confirmed cases            | deaths                | hospitalization        |
|                        | (1)                        | (2)                   | (3)                    |
| confirmed cases delay  | 0.456***<br>(0.026)        |                       |                        |
| confirmed cases growth | -0.00000<br>(0.00002)      |                       |                        |
| deaths delay           |                            | 0.535***<br>(0.032)   |                        |
| deaths growth          |                            | 0.001***<br>(0.0002)  |                        |
| hospitalization delay  |                            |                       | 0.536***<br>(0.027)    |
| hospitalization growth |                            |                       | 0.095***<br>(0.031)    |
| new test rate          | 56.134***<br>(14.218)      | 29.252***<br>(10.493) | 153.519***<br>(41.989) |
| precipitation          | -0.001<br>(0.001)          | -0.004***<br>(0.001)  | 0.001<br>(0.006)       |
| temperature            | 0.013***<br>(0.003)        | 0.001<br>(0.004)      | 0.048***<br>(0.015)    |
| retail and recreation  | -6.802***<br>(1.683)       | -1.546<br>(1.585)     | -32.481***<br>(10.657) |
| grocery and pharmacy   | 4.819**<br>(2.277)         | -0.665<br>(1.984)     | 10.359<br>(13.586)     |
| parks                  | 0.349***<br>(0.093)        | 0.255***<br>(0.074)   | 1.097***<br>(0.310)    |
| transit stations       | -0.837*<br>(0.473)         | 0.114<br>(0.415)      | -3.267<br>(2.046)      |

|                               |                       |                        |                         |
|-------------------------------|-----------------------|------------------------|-------------------------|
| workplaces                    | 1.123<br>(0.773)      | 2.323***<br>(0.722)    | 10.197***<br>(3.331)    |
| residential                   | -38.867***<br>(7.584) | -28.011***<br>(8.089)  | -263.254***<br>(47.976) |
| grocery and pharmacy squared  | -2.421**<br>(1.039)   | -0.016<br>(0.898)      | -4.887<br>(5.976)       |
| retail and recreation squared | 3.031***<br>(0.946)   | -0.075<br>(0.885)      | 14.553**<br>(5.616)     |
| parks squared                 | -0.076***<br>(0.019)  | -0.038**<br>(0.017)    | -0.199***<br>(0.063)    |
| transit stations squared      | 0.643**<br>(0.306)    | 0.039<br>(0.237)       | 2.056*<br>(1.145)       |
| workplaces squared            | -1.122**<br>(0.533)   | -1.599***<br>(0.533)   | -9.348***<br>(2.169)    |
| residential squared           | 18.581***<br>(3.308)  | 14.312***<br>(3.598)   | 122.574***<br>(21.793)  |
| stay-at-home day              | 0.0001**<br>(0.00003) | 0.0001**<br>(0.00003)  | -0.00002<br>(0.0001)    |
| business closure day          | 0.0001**<br>(0.00003) | 0.0001***<br>(0.00003) | 0.0001<br>(0.0001)      |
| day -10                       | 0.530***<br>(0.115)   | 0.290**<br>(0.139)     | 2.672***<br>(0.791)     |
| day -9                        | 0.537***<br>(0.117)   | 0.265*<br>(0.137)      | 2.820***<br>(0.878)     |
| day -8                        | 0.541***<br>(0.109)   | 0.243*<br>(0.142)      | 2.624***<br>(0.797)     |
| day -7                        | 0.572***<br>(0.112)   | 0.314**<br>(0.131)     | 2.536***<br>(0.773)     |
| day -6                        | 0.615***<br>(0.135)   | 0.377***<br>(0.137)    | 2.736***<br>(0.930)     |
| day -5                        | 0.649***              | 0.451***               | 2.802***                |

---

|        |                     |                     |                     |
|--------|---------------------|---------------------|---------------------|
|        | (0.131)             | (0.129)             | (0.877)             |
| day -4 | 0.602***<br>(0.133) | 0.494***<br>(0.125) | 2.715***<br>(0.834) |
| day -3 | 0.625***<br>(0.124) | 0.477***<br>(0.136) | 3.082***<br>(0.901) |
| day -2 | 0.645***<br>(0.127) | 0.564***<br>(0.125) | 3.125***<br>(0.863) |
| day -1 | 0.679***<br>(0.128) | 0.542***<br>(0.124) | 3.029***<br>(0.828) |
| day 1  | 0.668***<br>(0.127) | 0.494***<br>(0.145) | 2.610***<br>(0.768) |
| day 2  | 0.704***<br>(0.137) | 0.398***<br>(0.140) | 2.510***<br>(0.730) |
| day 3  | 0.653***<br>(0.133) | 0.236<br>(0.157)    | 2.237***<br>(0.778) |
| day 4  | 0.663***<br>(0.132) | 0.330**<br>(0.143)  | 2.085***<br>(0.709) |
| day 5  | 0.647***<br>(0.131) | 0.357**<br>(0.147)  | 2.018***<br>(0.673) |
| day 6  | 0.615***<br>(0.131) | 0.341**<br>(0.148)  | 1.741**<br>(0.673)  |
| day 7  | 0.561***<br>(0.133) | 0.296*<br>(0.154)   | 1.661**<br>(0.725)  |
| day 8  | 0.576***<br>(0.137) | 0.356**<br>(0.155)  | 1.642**<br>(0.716)  |
| day 9  | 0.600***<br>(0.134) | 0.403***<br>(0.137) | 1.718***<br>(0.595) |
| day 10 | 0.537***<br>(0.130) | 0.334**<br>(0.149)  | 1.439**<br>(0.633)  |
| day 11 | 0.544***<br>(0.129) | 0.295*<br>(0.157)   | 1.371**<br>(0.594)  |

---

|        |                     |                    |                   |
|--------|---------------------|--------------------|-------------------|
| day 12 | 0.507***<br>(0.121) | 0.314*<br>(0.160)  | 1.093*<br>(0.551) |
| day 13 | 0.488***<br>(0.122) | 0.205<br>(0.148)   | 0.768<br>(0.581)  |
| day 14 | 0.438***<br>(0.134) | 0.207<br>(0.155)   | 0.692<br>(0.580)  |
| day 15 | 0.488***<br>(0.129) | 0.234<br>(0.143)   | 1.059*<br>(0.528) |
| day 16 | 0.469***<br>(0.140) | 0.260**<br>(0.127) | 0.913*<br>(0.480) |
| day 17 | 0.486***<br>(0.140) | 0.235*<br>(0.130)  | 0.901*<br>(0.512) |
| day 18 | 0.412***<br>(0.140) | 0.235<br>(0.156)   | 0.610<br>(0.454)  |
| day 19 | 0.437***<br>(0.144) | 0.121<br>(0.132)   | 0.371<br>(0.524)  |
| day 20 | 0.430***<br>(0.140) | 0.117<br>(0.121)   | 0.399<br>(0.459)  |
| day 21 | 0.385**<br>(0.148)  | 0.100<br>(0.124)   | 0.155<br>(0.473)  |
| day 22 | 0.480***<br>(0.157) | 0.130<br>(0.120)   | 0.472<br>(0.452)  |
| day 23 | 0.501***<br>(0.166) | 0.187*<br>(0.111)  | 0.512<br>(0.444)  |
| day 24 | 0.393***<br>(0.146) | 0.141<br>(0.109)   | 0.341<br>(0.427)  |
| day 25 | 0.357**<br>(0.142)  | 0.184<br>(0.118)   | 0.518<br>(0.439)  |
| day 26 | 0.348**<br>(0.139)  | 0.195<br>(0.128)   | 0.574<br>(0.425)  |

---

|              |                      |                      |                        |
|--------------|----------------------|----------------------|------------------------|
| day 27       | 0.203<br>(0.136)     | 0.222*<br>(0.132)    | 0.462<br>(0.403)       |
| day 28       | 0.149<br>(0.127)     | 0.183<br>(0.128)     | 0.453<br>(0.476)       |
| day 29       | 0.190<br>(0.121)     | 0.326**<br>(0.138)   | 0.813*<br>(0.436)      |
| day 30       | 0.154<br>(0.124)     | 0.266*<br>(0.132)    | 0.591<br>(0.409)       |
| day 31       | 0.092<br>(0.125)     | 0.227**<br>(0.111)   | 0.383<br>(0.402)       |
| day 32       | 0.126<br>(0.116)     | 0.270**<br>(0.115)   | 0.399<br>(0.400)       |
| day 33       | 0.031<br>(0.121)     | 0.170<br>(0.131)     | 0.154<br>(0.433)       |
| day 34       | 0.042<br>(0.111)     | 0.144<br>(0.134)     | 0.171<br>(0.419)       |
| day 35       | -0.052<br>(0.112)    | 0.107<br>(0.126)     | -0.119<br>(0.444)      |
| day 36       | -0.010<br>(0.120)    | 0.176<br>(0.117)     | 0.024<br>(0.452)       |
| day 37       | -0.022<br>(0.112)    | 0.219*<br>(0.124)    | -0.135<br>(0.427)      |
| day 38       | -0.050<br>(0.104)    | 0.108<br>(0.105)     | -0.270<br>(0.410)      |
| day 39       | -0.089<br>(0.100)    | 0.056<br>(0.107)     | -0.473<br>(0.443)      |
| day 40       | -0.062<br>(0.084)    | 0.001<br>(0.100)     | -0.615<br>(0.370)      |
| Constant     | 19.299***<br>(4.764) | 13.273***<br>(4.744) | 148.346***<br>(29.415) |
| Observations | 10,078               | 10,078               | 10,078                 |

---

|                                 |       |                             |       |
|---------------------------------|-------|-----------------------------|-------|
| R <sup>2</sup>                  | 0.654 | 0.533                       | 0.708 |
| Adjusted R <sup>2</sup>         | 0.649 | 0.527                       | 0.705 |
| Residual Std. Error (df = 9956) | 0.591 | 0.686                       | 2.646 |
| <i>Note:</i>                    |       | *p<0.1; **p<0.05; ***p<0.01 |       |

---



**S6 Table. Regression table.** Event Study regression summary statistics for robustness check (fig. 2) where we only consider mask mandates that require business employees to wear masks.

|                        | <i>Dependent variable:</i> |                      |                        |
|------------------------|----------------------------|----------------------|------------------------|
|                        | confirmed cases            | deaths               | hospitalization        |
|                        | (1)                        | (2)                  | (3)                    |
| confirmed cases delay  | 0.484***<br>(0.025)        |                      |                        |
| confirmed cases growth | -0.00000<br>(0.00002)      |                      |                        |
| deaths delay           |                            | 0.507***<br>(0.031)  |                        |
| deaths growth          |                            | 0.001***<br>(0.0002) |                        |
| hospitalization delay  |                            |                      | 0.549***<br>(0.027)    |
| hospitalization growth |                            |                      | 0.108***<br>(0.032)    |
| new test rate          | 56.130***<br>(14.672)      | 27.994**<br>(10.586) | 154.780***<br>(43.300) |
| precipitation          | -0.001<br>(0.001)          | -0.004***<br>(0.001) | 0.002<br>(0.006)       |
| temperature            | 0.016***<br>(0.003)        | 0.002<br>(0.004)     | 0.055***<br>(0.015)    |
| retail and recreation  | -7.807***<br>(1.799)       | -2.328<br>(1.541)    | -35.948***<br>(11.343) |
| grocery and pharmacy   | 5.806**<br>(2.311)         | -0.059<br>(2.016)    | 12.629<br>(14.240)     |
| parks                  | 0.389***<br>(0.096)        | 0.258***<br>(0.074)  | 1.217***<br>(0.319)    |
| transit stations       | -1.213**<br>(0.509)        | 0.007<br>(0.423)     | -4.111*<br>(2.082)     |

|                               |                       |                        |                         |
|-------------------------------|-----------------------|------------------------|-------------------------|
| workplaces                    | 1.498*<br>(0.817)     | 2.093***<br>(0.704)    | 10.571***<br>(3.451)    |
| residential                   | -43.651***<br>(7.292) | -29.103***<br>(7.766)  | -280.024***<br>(52.177) |
| grocery and pharmacy squared  | -2.851**<br>(1.067)   | -0.293<br>(0.916)      | -5.894<br>(6.264)       |
| retail and recreation squared | 3.552***<br>(1.013)   | 0.385<br>(0.861)       | 16.549***<br>(5.995)    |
| parks squared                 | -0.086***<br>(0.019)  | -0.041**<br>(0.016)    | -0.235***<br>(0.064)    |
| transit stations squared      | 0.959***<br>(0.342)   | 0.167<br>(0.241)       | 2.864**<br>(1.187)      |
| workplaces squared            | -1.461**<br>(0.554)   | -1.465***<br>(0.512)   | -9.854***<br>(2.282)    |
| residential squared           | 20.749***<br>(3.182)  | 14.671***<br>(3.468)   | 130.035***<br>(23.686)  |
| stay-at-home day              | 0.0001**<br>(0.00003) | 0.0001**<br>(0.00003)  | -0.00000<br>(0.0001)    |
| business closure day          | 0.0001*<br>(0.00003)  | 0.0001***<br>(0.00003) | -0.00001<br>(0.0001)    |
| day -10                       | 0.359***<br>(0.121)   | 0.483***<br>(0.124)    | 1.785***<br>(0.655)     |
| day -9                        | 0.319***<br>(0.119)   | 0.472***<br>(0.134)    | 1.573**<br>(0.662)      |
| day -8                        | 0.367***<br>(0.116)   | 0.494***<br>(0.146)    | 1.579**<br>(0.642)      |
| day -7                        | 0.337***<br>(0.114)   | 0.541***<br>(0.129)    | 1.296**<br>(0.597)      |
| day -6                        | 0.392***<br>(0.112)   | 0.558***<br>(0.132)    | 1.653**<br>(0.679)      |
| day -5                        | 0.388***              | 0.580***               | 1.478**                 |

---

|        |                     |                     |                     |
|--------|---------------------|---------------------|---------------------|
|        | (0.113)             | (0.134)             | (0.632)             |
| day -4 | 0.399***<br>(0.127) | 0.609***<br>(0.121) | 1.689**<br>(0.657)  |
| day -3 | 0.436***<br>(0.130) | 0.657***<br>(0.124) | 2.106***<br>(0.711) |
| day -2 | 0.390***<br>(0.113) | 0.579***<br>(0.108) | 2.076***<br>(0.734) |
| day -1 | 0.397***<br>(0.116) | 0.617***<br>(0.117) | 2.140***<br>(0.721) |
| day 1  | 0.386***<br>(0.125) | 0.690***<br>(0.136) | 2.156***<br>(0.779) |
| day 2  | 0.375***<br>(0.126) | 0.619***<br>(0.140) | 1.973***<br>(0.736) |
| day 3  | 0.364***<br>(0.128) | 0.509***<br>(0.148) | 1.870**<br>(0.811)  |
| day 4  | 0.284**<br>(0.129)  | 0.516***<br>(0.140) | 1.573*<br>(0.803)   |
| day 5  | 0.284**<br>(0.130)  | 0.474***<br>(0.142) | 1.255*<br>(0.737)   |
| day 6  | 0.281**<br>(0.129)  | 0.420***<br>(0.138) | 1.084<br>(0.706)    |
| day 7  | 0.196<br>(0.133)    | 0.268*<br>(0.142)   | 0.821<br>(0.742)    |
| day 8  | 0.273**<br>(0.126)  | 0.439***<br>(0.141) | 1.047<br>(0.697)    |
| day 9  | 0.254**<br>(0.119)  | 0.444***<br>(0.134) | 0.906<br>(0.589)    |
| day 10 | 0.241**<br>(0.110)  | 0.375**<br>(0.147)  | 0.829<br>(0.601)    |
| day 11 | 0.221*<br>(0.111)   | 0.378**<br>(0.153)  | 0.700<br>(0.649)    |

---

|        |                   |                     |                   |
|--------|-------------------|---------------------|-------------------|
| day 12 | 0.180*<br>(0.106) | 0.494***<br>(0.161) | 0.403<br>(0.596)  |
| day 13 | 0.158<br>(0.104)  | 0.382**<br>(0.151)  | 0.216<br>(0.614)  |
| day 14 | 0.067<br>(0.103)  | 0.329**<br>(0.155)  | -0.022<br>(0.657) |
| day 15 | 0.170*<br>(0.095) | 0.272*<br>(0.138)   | 0.187<br>(0.578)  |
| day 16 | 0.194*<br>(0.111) | 0.326**<br>(0.143)  | 0.095<br>(0.562)  |
| day 17 | 0.147<br>(0.115)  | 0.350**<br>(0.151)  | 0.119<br>(0.545)  |
| day 18 | 0.132<br>(0.109)  | 0.324*<br>(0.163)   | -0.010<br>(0.427) |
| day 19 | 0.120<br>(0.120)  | 0.192<br>(0.150)    | -0.090<br>(0.480) |
| day 20 | 0.157<br>(0.108)  | 0.266<br>(0.159)    | 0.129<br>(0.447)  |
| day 21 | 0.061<br>(0.113)  | 0.231<br>(0.152)    | -0.249<br>(0.405) |
| day 22 | 0.155<br>(0.109)  | 0.243<br>(0.146)    | 0.278<br>(0.470)  |
| day 23 | 0.197*<br>(0.113) | 0.256*<br>(0.146)   | 0.168<br>(0.438)  |
| day 24 | 0.115<br>(0.103)  | 0.198<br>(0.139)    | -0.045<br>(0.445) |
| day 25 | 0.132<br>(0.100)  | 0.191<br>(0.138)    | 0.283<br>(0.447)  |
| day 26 | 0.066<br>(0.081)  | 0.117<br>(0.126)    | 0.088<br>(0.409)  |

---

|              |                      |                      |                        |
|--------------|----------------------|----------------------|------------------------|
| day 27       | 0.027<br>(0.077)     | 0.159<br>(0.124)     | 0.070<br>(0.360)       |
| day 28       | -0.009<br>(0.078)    | 0.136<br>(0.117)     | 0.061<br>(0.388)       |
| day 29       | 0.049<br>(0.064)     | 0.258**<br>(0.113)   | 0.487<br>(0.420)       |
| day 30       | 0.032<br>(0.069)     | 0.201*<br>(0.110)    | 0.455<br>(0.396)       |
| day 31       | 0.046<br>(0.074)     | 0.192*<br>(0.104)    | 0.429<br>(0.353)       |
| day 32       | 0.033<br>(0.070)     | 0.198*<br>(0.103)    | 0.427<br>(0.339)       |
| day 33       | -0.027<br>(0.075)    | 0.141<br>(0.095)     | 0.215<br>(0.339)       |
| day 34       | -0.053<br>(0.063)    | 0.171*<br>(0.094)    | 0.190<br>(0.340)       |
| day 35       | -0.082<br>(0.068)    | 0.104<br>(0.097)     | 0.098<br>(0.353)       |
| day 36       | -0.016<br>(0.078)    | 0.137<br>(0.087)     | 0.217<br>(0.370)       |
| day 37       | -0.083<br>(0.064)    | 0.122<br>(0.083)     | 0.032<br>(0.356)       |
| day 38       | -0.138**<br>(0.064)  | 0.081<br>(0.088)     | 0.046<br>(0.331)       |
| day 39       | -0.127*<br>(0.068)   | 0.102<br>(0.090)     | -0.044<br>(0.340)      |
| day 40       | -0.098<br>(0.062)    | 0.099<br>(0.086)     | -0.155<br>(0.323)      |
| Constant     | 21.776***<br>(4.576) | 13.946***<br>(4.609) | 157.608***<br>(31.988) |
| Observations | 10,078               | 10,078               | 10,078                 |

---

|                                 |       |                             |       |
|---------------------------------|-------|-----------------------------|-------|
| R <sup>2</sup>                  | 0.636 | 0.543                       | 0.701 |
| Adjusted R <sup>2</sup>         | 0.632 | 0.537                       | 0.698 |
| Residual Std. Error (df = 9956) | 0.606 | 0.678                       | 2.678 |
| <i>Note:</i>                    |       | *p<0.1; **p<0.05; ***p<0.01 |       |

---

**S7 Table. Regression table.** Event Study regression summary statistics for robustness check (S6. [fig](#)) where we compare the effect of mask mandates on deaths and hospitalization with and without controlling for cases.

|                        | <i>Dependent variable:</i> |                      |                        |                      |
|------------------------|----------------------------|----------------------|------------------------|----------------------|
|                        | deaths<br>(1)              | deaths<br>(2)        | hosp.<br>(3)           | hosp.<br>(4)         |
| confirmed cases        |                            | 0.410***<br>(0.022)  |                        | 1.990***<br>(0.243)  |
| deaths delay           | 0.507***<br>(0.031)        | 0.439***<br>(0.031)  |                        |                      |
| deaths growth          | 0.001***<br>(0.0002)       | 0.001***<br>(0.0001) |                        |                      |
| hospitalization delay  |                            |                      | 0.549***<br>(0.027)    | 0.387***<br>(0.027)  |
| hospitalization growth |                            |                      | 0.109***<br>(0.032)    | 0.082***<br>(0.030)  |
| new test rate          | 27.940**<br>(10.586)       | -1.096<br>(6.646)    | 154.787***<br>(43.311) | 31.262<br>(38.780)   |
| precipitation          | -0.004***<br>(0.001)       | -0.004***<br>(0.001) | 0.002<br>(0.006)       | 0.005<br>(0.006)     |
| temperature            | 0.002<br>(0.004)           | -0.003<br>(0.004)    | 0.055***<br>(0.015)    | 0.023<br>(0.015)     |
| retail & recreation    | -2.338<br>(1.539)          | 1.218<br>(1.097)     | -35.993***<br>(11.299) | -20.360**<br>(9.758) |
| grocery & pharmacy     | -0.025<br>(2.015)          | -2.114<br>(1.760)    | 12.745<br>(14.192)     | 5.766<br>(12.601)    |
| parks                  | 0.259***<br>(0.074)        | 0.056<br>(0.069)     | 1.210***<br>(0.319)    | 0.339<br>(0.316)     |
| transit stations       | 0.007<br>(0.423)           | 0.413<br>(0.441)     | -4.089*<br>(2.081)     | -2.765<br>(1.875)    |
| workplaces             | 2.085***<br>(0.704)        | 2.317***<br>(0.549)  | 10.502***<br>(3.450)   | 12.020***<br>(2.733) |

|                             |                        |                        |                         |                         |
|-----------------------------|------------------------|------------------------|-------------------------|-------------------------|
| residential                 | -29.042***<br>(7.774)  | -2.983<br>(7.367)      | -279.358***<br>(52.035) | -174.851***<br>(42.791) |
| grocery & pharmacy squared  | -0.308<br>(0.916)      | 0.733<br>(0.822)       | -5.955<br>(6.241)       | -2.425<br>(5.565)       |
| retail & recreation squared | 0.390<br>(0.860)       | -1.315**<br>(0.640)    | 16.584***<br>(5.968)    | 8.999*<br>(5.230)       |
| parks squared               | -0.041**<br>(0.016)    | 0.011<br>(0.017)       | -0.233***<br>(0.064)    | -0.001<br>(0.067)       |
| transit stations squared    | 0.168<br>(0.241)       | -0.181<br>(0.261)      | 2.857**<br>(1.187)      | 1.532<br>(1.173)        |
| workplaces squared          | -1.463***<br>(0.512)   | -1.471***<br>(0.404)   | -9.818***<br>(2.276)    | -10.316***<br>(1.907)   |
| residential squared         | 14.635***<br>(3.471)   | 2.518<br>(3.255)       | 129.688***<br>(23.620)  | 80.931***<br>(19.252)   |
| stay-at-home day            | 0.0001**<br>(0.00003)  | 0.00003<br>(0.00003)   | -0.00000<br>(0.0001)    | -0.0002<br>(0.0001)     |
| business closure day        | 0.0001***<br>(0.00003) | 0.0001***<br>(0.00003) | -0.00001<br>(0.0001)    | -0.0001<br>(0.0001)     |
| day -10                     | 0.478***<br>(0.123)    | 0.310***<br>(0.109)    | 1.732***<br>(0.629)     | 1.042**<br>(0.492)      |
| day -9                      | 0.463***<br>(0.133)    | 0.325**<br>(0.123)     | 1.534**<br>(0.642)      | 0.995*<br>(0.525)       |
| day -8                      | 0.491***<br>(0.146)    | 0.328**<br>(0.136)     | 1.571**<br>(0.639)      | 0.942*<br>(0.516)       |
| day -7                      | 0.553***<br>(0.130)    | 0.395***<br>(0.126)    | 1.372**<br>(0.632)      | 0.795<br>(0.530)        |
| day -6                      | 0.559***<br>(0.132)    | 0.374***<br>(0.123)    | 1.693**<br>(0.698)      | 1.007*<br>(0.556)       |
| day -5                      | 0.564***<br>(0.131)    | 0.389***<br>(0.118)    | 1.549**<br>(0.664)      | 0.918*<br>(0.547)       |

---



|        |                     |                     |                     |                    |
|--------|---------------------|---------------------|---------------------|--------------------|
| day -4 | 0.592***<br>(0.119) | 0.404***<br>(0.106) | 1.720**<br>(0.669)  | 1.022*<br>(0.531)  |
| day -3 | 0.648***<br>(0.123) | 0.446***<br>(0.111) | 2.189***<br>(0.744) | 1.442**<br>(0.608) |
| day -2 | 0.582***<br>(0.108) | 0.393***<br>(0.092) | 2.181***<br>(0.764) | 1.472**<br>(0.622) |
| day -1 | 0.617***<br>(0.116) | 0.423***<br>(0.093) | 2.294***<br>(0.758) | 1.561**<br>(0.625) |
| day 1  | 0.688***<br>(0.136) | 0.487***<br>(0.113) | 2.260***<br>(0.797) | 1.537**<br>(0.649) |
| day 2  | 0.614***<br>(0.139) | 0.414***<br>(0.115) | 2.060***<br>(0.743) | 1.366**<br>(0.608) |
| day 3  | 0.508***<br>(0.148) | 0.299**<br>(0.126)  | 1.956**<br>(0.815)  | 1.243*<br>(0.658)  |
| day 4  | 0.523***<br>(0.142) | 0.328***<br>(0.119) | 1.701**<br>(0.810)  | 1.068<br>(0.646)   |
| day 5  | 0.494***<br>(0.146) | 0.323**<br>(0.127)  | 1.384*<br>(0.733)   | 0.863<br>(0.606)   |
| day 6  | 0.432***<br>(0.141) | 0.256**<br>(0.124)  | 1.186*<br>(0.703)   | 0.648<br>(0.560)   |
| day 7  | 0.272*<br>(0.143)   | 0.132<br>(0.118)    | 0.934<br>(0.734)    | 0.552<br>(0.569)   |
| day 8  | 0.426***<br>(0.139) | 0.254**<br>(0.124)  | 1.068<br>(0.693)    | 0.562<br>(0.526)   |
| day 9  | 0.452***<br>(0.135) | 0.282**<br>(0.124)  | 0.925<br>(0.587)    | 0.447<br>(0.438)   |
| day 10 | 0.390**<br>(0.149)  | 0.219<br>(0.132)    | 0.833<br>(0.600)    | 0.344<br>(0.455)   |
| day 11 | 0.392**<br>(0.155)  | 0.228*<br>(0.131)   | 0.724<br>(0.646)    | 0.298<br>(0.495)   |
| day 12 | 0.491***            | 0.360**             | 0.388               | 0.137              |

---

|        |                    |                   |                   |                   |
|--------|--------------------|-------------------|-------------------|-------------------|
|        | (0.160)            | (0.134)           | (0.596)           | (0.479)           |
| day 13 | 0.367**<br>(0.149) | 0.241*<br>(0.120) | 0.137<br>(0.615)  | -0.073<br>(0.510) |
| day 14 | 0.326**<br>(0.154) | 0.236*<br>(0.120) | -0.085<br>(0.657) | -0.146<br>(0.537) |
| day 15 | 0.259*<br>(0.135)  | 0.138<br>(0.104)  | 0.152<br>(0.574)  | -0.066<br>(0.485) |
| day 16 | 0.312**<br>(0.140) | 0.175*<br>(0.104) | 0.108<br>(0.562)  | -0.162<br>(0.478) |
| day 17 | 0.331**<br>(0.148) | 0.207*<br>(0.109) | 0.146<br>(0.547)  | -0.067<br>(0.455) |
| day 18 | 0.318*<br>(0.162)  | 0.209<br>(0.141)  | 0.033<br>(0.432)  | -0.138<br>(0.391) |
| day 19 | 0.196<br>(0.151)   | 0.094<br>(0.124)  | -0.038<br>(0.485) | -0.208<br>(0.414) |
| day 20 | 0.276*<br>(0.161)  | 0.148<br>(0.132)  | 0.130<br>(0.447)  | -0.180<br>(0.391) |
| day 21 | 0.257<br>(0.156)   | 0.163<br>(0.126)  | -0.257<br>(0.404) | -0.383<br>(0.384) |
| day 22 | 0.270*<br>(0.150)  | 0.148<br>(0.123)  | 0.188<br>(0.451)  | -0.112<br>(0.395) |
| day 23 | 0.272*<br>(0.148)  | 0.145<br>(0.120)  | 0.104<br>(0.421)  | -0.244<br>(0.378) |
| day 24 | 0.210<br>(0.140)   | 0.112<br>(0.114)  | -0.060<br>(0.441) | -0.300<br>(0.390) |
| day 25 | 0.198<br>(0.138)   | 0.090<br>(0.114)  | 0.289<br>(0.449)  | 0.017<br>(0.407)  |
| day 26 | 0.129<br>(0.127)   | 0.072<br>(0.115)  | 0.139<br>(0.424)  | 0.049<br>(0.419)  |
| day 27 | 0.169<br>(0.124)   | 0.128<br>(0.105)  | 0.116<br>(0.371)  | 0.113<br>(0.369)  |

---

|                         |                      |                    |                        |                        |
|-------------------------|----------------------|--------------------|------------------------|------------------------|
| day 28                  | 0.141<br>(0.117)     | 0.102<br>(0.099)   | 0.188<br>(0.415)       | 0.202<br>(0.374)       |
| day 29                  | 0.257**<br>(0.113)   | 0.208**<br>(0.101) | 0.560<br>(0.430)       | 0.546<br>(0.381)       |
| day 30                  | 0.189*<br>(0.110)    | 0.150<br>(0.102)   | 0.489<br>(0.400)       | 0.495<br>(0.374)       |
| day 31                  | 0.187*<br>(0.104)    | 0.139<br>(0.095)   | 0.428<br>(0.352)       | 0.388<br>(0.355)       |
| day 32                  | 0.194*<br>(0.103)    | 0.143<br>(0.093)   | 0.445<br>(0.344)       | 0.375<br>(0.345)       |
| day 33                  | 0.147<br>(0.096)     | 0.132<br>(0.079)   | 0.252<br>(0.346)       | 0.338<br>(0.363)       |
| day 34                  | 0.157*<br>(0.093)    | 0.151*<br>(0.078)  | 0.268<br>(0.347)       | 0.384<br>(0.369)       |
| day 35                  | 0.101<br>(0.097)     | 0.098<br>(0.090)   | 0.202<br>(0.357)       | 0.299<br>(0.387)       |
| day 36                  | 0.116<br>(0.085)     | 0.095<br>(0.071)   | 0.309<br>(0.369)       | 0.337<br>(0.370)       |
| day 37                  | 0.113<br>(0.081)     | 0.126*<br>(0.071)  | 0.100<br>(0.347)       | 0.284<br>(0.361)       |
| day 38                  | 0.072<br>(0.087)     | 0.107<br>(0.076)   | 0.105<br>(0.320)       | 0.382<br>(0.327)       |
| day 39                  | 0.092<br>(0.087)     | 0.112<br>(0.082)   | 0.016<br>(0.330)       | 0.255<br>(0.338)       |
| day 40                  | 0.098<br>(0.086)     | 0.134<br>(0.085)   | -0.089<br>(0.307)      | 0.213<br>(0.340)       |
| Constant                | 13.914***<br>(4.614) | 0.155<br>(4.280)   | 157.262***<br>(31.907) | 102.532***<br>(26.332) |
| Observations            | 10,078               | 10,078             | 10,078                 | 10,078                 |
| R <sup>2</sup>          | 0.543                | 0.630              | 0.702                  | 0.776                  |
| Adjusted R <sup>2</sup> | 0.537                | 0.625              | 0.698                  | 0.773                  |

---

Residual Std. Error            0.678 (df = 9956)  0.610 (df = 9955)  2.675 (df = 9956)  2.318 (df = 9955)

---

*Note:*

\*p<0.1; \*\*p<0.05; \*\*\*p<0.01

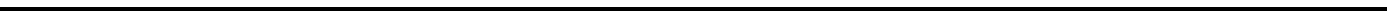

**S8 Table. Regression table.** Event Study regression summary statistics for robustness check (S1 Fig) where we **do not** control for past outcome values (with a delay of 14 days) and growth rates as a way to minimize confounding due to peoples private behavioral changes to COVID-19 [35].

|                               | <i>Dependent variable:</i> |                        |                         |
|-------------------------------|----------------------------|------------------------|-------------------------|
|                               | confirmed cases            | deaths                 | hospitalization         |
|                               | (1)                        | (2)                    | (3)                     |
| new test rate                 | 63.679***<br>(19.620)      | 6.182<br>(13.231)      | 165.527**<br>(63.288)   |
| precipitation                 | -0.002<br>(0.001)          | -0.003**<br>(0.001)    | 0.003<br>(0.007)        |
| temperature                   | 0.010*<br>(0.005)          | -0.004<br>(0.006)      | 0.016<br>(0.022)        |
| retail and recreation         | -7.494**<br>(3.153)        | 1.258<br>(2.832)       | -34.017*<br>(19.747)    |
| grocery and pharmacy          | 3.617<br>(3.774)           | -4.518<br>(3.380)      | 14.073<br>(23.450)      |
| parks                         | 0.527***<br>(0.133)        | 0.352**<br>(0.135)     | 1.811***<br>(0.509)     |
| transit stations              | -0.898<br>(0.780)          | 0.290<br>(0.659)       | -5.671<br>(3.489)       |
| workplaces                    | -1.380<br>(1.045)          | -0.387<br>(0.921)      | 6.578<br>(5.551)        |
| residential                   | -67.735***<br>(11.767)     | -41.543***<br>(11.082) | -382.215***<br>(74.552) |
| grocery and pharmacy squared  | -1.807<br>(1.681)          | 1.915<br>(1.518)       | -6.424<br>(10.253)      |
| retail and recreation squared | 3.545**<br>(1.713)         | -1.475<br>(1.525)      | 14.954<br>(10.426)      |
| parks squared                 | -0.133***<br>(0.028)       | -0.062**<br>(0.027)    | -0.346***<br>(0.105)    |
| transit stations squared      | 0.739<br>(0.517)           | -0.171<br>(0.445)      | 3.364*<br>(1.897)       |

|                      |                        |                        |                        |
|----------------------|------------------------|------------------------|------------------------|
| workplaces squared   | 0.581<br>(0.725)       | 0.245<br>(0.643)       | -7.750**<br>(3.735)    |
| residential squared  | 31.377***<br>(5.201)   | 20.090***<br>(4.956)   | 176.199***<br>(33.936) |
| stay-at-home day     | 0.0001***<br>(0.00003) | 0.0001***<br>(0.00003) | 0.0002*<br>(0.0001)    |
| business closure day | -0.00001<br>(0.00003)  | 0.0001***<br>(0.00003) | -0.0003**<br>(0.0001)  |
| day -10              | 0.470***<br>(0.135)    | 0.656***<br>(0.148)    | 2.536***<br>(0.764)    |
| day -9               | 0.395***<br>(0.127)    | 0.638***<br>(0.155)    | 2.338***<br>(0.744)    |
| day -8               | 0.459***<br>(0.137)    | 0.676***<br>(0.171)    | 2.502***<br>(0.761)    |
| day -7               | 0.441***<br>(0.121)    | 0.725***<br>(0.155)    | 2.363***<br>(0.725)    |
| day -6               | 0.527***<br>(0.131)    | 0.784***<br>(0.158)    | 2.890***<br>(0.787)    |
| day -5               | 0.501***<br>(0.120)    | 0.788***<br>(0.158)    | 2.757***<br>(0.758)    |
| day -4               | 0.547***<br>(0.134)    | 0.853***<br>(0.146)    | 3.009***<br>(0.754)    |
| day -3               | 0.588***<br>(0.136)    | 0.933***<br>(0.149)    | 3.588***<br>(0.854)    |
| day -2               | 0.551***<br>(0.129)    | 0.856***<br>(0.140)    | 3.460***<br>(0.835)    |
| day -1               | 0.577***<br>(0.137)    | 0.933***<br>(0.150)    | 3.663***<br>(0.832)    |
| day 1                | 0.620***<br>(0.146)    | 1.078***<br>(0.168)    | 3.955***<br>(0.839)    |

---

|        |                     |                     |                     |
|--------|---------------------|---------------------|---------------------|
| day 2  | 0.623***<br>(0.149) | 1.026***<br>(0.170) | 3.880***<br>(0.777) |
| day 3  | 0.664***<br>(0.153) | 0.977***<br>(0.173) | 3.985***<br>(0.846) |
| day 4  | 0.632***<br>(0.160) | 0.996***<br>(0.168) | 3.787***<br>(0.871) |
| day 5  | 0.567***<br>(0.146) | 0.947***<br>(0.166) | 3.404***<br>(0.750) |
| day 6  | 0.581***<br>(0.145) | 0.897***<br>(0.166) | 3.250***<br>(0.766) |
| day 7  | 0.513***<br>(0.153) | 0.796***<br>(0.162) | 3.065***<br>(0.792) |
| day 8  | 0.586***<br>(0.151) | 0.933***<br>(0.162) | 3.273***<br>(0.780) |
| day 9  | 0.578***<br>(0.143) | 0.945***<br>(0.164) | 3.173***<br>(0.716) |
| day 10 | 0.603***<br>(0.148) | 0.949***<br>(0.170) | 3.208***<br>(0.780) |
| day 11 | 0.586***<br>(0.157) | 0.956***<br>(0.172) | 3.202***<br>(0.864) |
| day 12 | 0.492***<br>(0.142) | 1.011***<br>(0.168) | 2.827***<br>(0.751) |
| day 13 | 0.490***<br>(0.145) | 0.924***<br>(0.168) | 2.704***<br>(0.770) |
| day 14 | 0.399**<br>(0.163)  | 0.862***<br>(0.181) | 2.373***<br>(0.868) |
| day 15 | 0.496***<br>(0.147) | 0.865***<br>(0.161) | 2.731***<br>(0.811) |
| day 16 | 0.522***<br>(0.156) | 0.886***<br>(0.178) | 2.690***<br>(0.815) |
| day 17 | 0.487***            | 0.888***            | 2.681***            |

---

|        |                     |                     |                     |
|--------|---------------------|---------------------|---------------------|
|        | (0.169)             | (0.176)             | (0.856)             |
| day 18 | 0.454***<br>(0.162) | 0.888***<br>(0.184) | 2.492***<br>(0.776) |
| day 19 | 0.432**<br>(0.174)  | 0.755***<br>(0.174) | 2.274***<br>(0.759) |
| day 20 | 0.479***<br>(0.170) | 0.778***<br>(0.187) | 2.282***<br>(0.765) |
| day 21 | 0.386**<br>(0.177)  | 0.738***<br>(0.177) | 1.895**<br>(0.708)  |
| day 22 | 0.469***<br>(0.171) | 0.791***<br>(0.167) | 2.308***<br>(0.745) |
| day 23 | 0.484***<br>(0.165) | 0.800***<br>(0.171) | 2.165***<br>(0.700) |
| day 24 | 0.403**<br>(0.164)  | 0.704***<br>(0.175) | 1.822**<br>(0.752)  |
| day 25 | 0.435**<br>(0.166)  | 0.722***<br>(0.171) | 2.276***<br>(0.806) |
| day 26 | 0.317**<br>(0.144)  | 0.668***<br>(0.155) | 1.955**<br>(0.737)  |
| day 27 | 0.261*<br>(0.134)   | 0.658***<br>(0.158) | 1.850***<br>(0.675) |
| day 28 | 0.256*<br>(0.135)   | 0.629***<br>(0.155) | 1.942**<br>(0.727)  |
| day 29 | 0.259**<br>(0.128)  | 0.677***<br>(0.145) | 2.238***<br>(0.783) |
| day 30 | 0.239*<br>(0.120)   | 0.620***<br>(0.134) | 2.103***<br>(0.723) |
| day 31 | 0.269**<br>(0.133)  | 0.643***<br>(0.141) | 2.091***<br>(0.715) |
| day 32 | 0.265*<br>(0.133)   | 0.620***<br>(0.149) | 1.977***<br>(0.710) |

---



|                                 |                      |                             |                        |
|---------------------------------|----------------------|-----------------------------|------------------------|
| day 33                          | 0.163<br>(0.127)     | 0.528***<br>(0.136)         | 1.626***<br>(0.596)    |
| day 34                          | 0.143<br>(0.123)     | 0.549***<br>(0.135)         | 1.610**<br>(0.609)     |
| day 35                          | 0.143<br>(0.121)     | 0.510***<br>(0.140)         | 1.476**<br>(0.574)     |
| day 36                          | 0.173<br>(0.125)     | 0.485***<br>(0.136)         | 1.554**<br>(0.603)     |
| day 37                          | 0.081<br>(0.108)     | 0.457***<br>(0.133)         | 1.255**<br>(0.553)     |
| day 38                          | 0.031<br>(0.109)     | 0.420***<br>(0.139)         | 1.240**<br>(0.558)     |
| day 39                          | 0.066<br>(0.118)     | 0.441***<br>(0.139)         | 1.255**<br>(0.581)     |
| day 40                          | 0.015<br>(0.099)     | 0.413***<br>(0.132)         | 1.022**<br>(0.478)     |
| Constant                        | 36.231***<br>(7.200) | 21.931***<br>(6.593)        | 216.114***<br>(45.786) |
| Observations                    | 10,078               | 10,078                      | 10,078                 |
| R <sup>2</sup>                  | 0.462                | 0.336                       | 0.528                  |
| Adjusted R <sup>2</sup>         | 0.455                | 0.328                       | 0.523                  |
| Residual Std. Error (df = 9958) | 0.737                | 0.817                       | 3.365                  |
| <i>Note:</i>                    |                      | *p<0.1; **p<0.05; ***p<0.01 |                        |

**S9 Table. Regression table.** Event Study regression summary statistics of fig. 3 for earlier states only, i.e. NY, NJ, MA, CT, MI, DC, RI, IL, WA, PA, GA, VT, MD, FL, LA).

|                        | <i>Dependent variable:</i> |                       |                        |
|------------------------|----------------------------|-----------------------|------------------------|
|                        | confirmed cases            | deaths                | hospitalization        |
|                        | (1)                        | (2)                   | (3)                    |
| confirmed cases delay  | 0.440***<br>(0.048)        |                       |                        |
| confirmed cases growth | -0.00003<br>(0.0003)       |                       |                        |
| deaths delay           |                            | 0.446***<br>(0.040)   |                        |
| deaths growth          |                            | 0.001***<br>(0.00005) |                        |
| hospitalization delay  |                            |                       | 0.484***<br>(0.056)    |
| hospitalization growth |                            |                       | -0.006<br>(0.057)      |
| new test rate          | 70.321**<br>(25.290)       | 20.775*<br>(11.778)   | 196.094**<br>(87.126)  |
| precipitation          | 0.001<br>(0.001)           | -0.002<br>(0.001)     | 0.004<br>(0.010)       |
| temperature            | 0.008<br>(0.005)           | -0.003<br>(0.003)     | -0.008<br>(0.026)      |
| retail and recreation  | -10.779***<br>(1.638)      | -4.643**<br>(1.733)   | -61.478***<br>(14.706) |
| grocery and pharmacy   | 2.930<br>(3.220)           | 1.205<br>(2.430)      | 27.626<br>(23.367)     |
| parks                  | 0.558***<br>(0.151)        | 0.293***<br>(0.092)   | 1.744<br>(1.205)       |
| transit stations       | -2.959***<br>(0.876)       | -0.614**<br>(0.262)   | -9.308<br>(5.784)      |

|                               |                       |                     |                         |
|-------------------------------|-----------------------|---------------------|-------------------------|
| workplaces                    | 3.135**<br>(1.271)    | 2.219***<br>(0.642) | 20.317**<br>(8.144)     |
| residential                   | -37.952***<br>(9.857) | -16.756*<br>(9.384) | -297.310***<br>(70.255) |
| grocery and pharmacy squared  | -1.515<br>(1.632)     | -0.877<br>(1.225)   | -12.125<br>(10.741)     |
| retail and recreation squared | 5.169***<br>(0.898)   | 1.941*<br>(0.973)   | 29.777***<br>(7.947)    |
| parks squared                 | -0.089***<br>(0.029)  | -0.039<br>(0.026)   | -0.253<br>(0.197)       |
| transit stations squared      | 2.348**<br>(0.847)    | 0.252<br>(0.261)    | 5.579<br>(3.494)        |
| workplaces squared            | -2.546**<br>(0.913)   | -1.326**<br>(0.455) | -16.194***<br>(5.190)   |
| residential squared           | 18.338***<br>(4.305)  | 8.881**<br>(4.090)  | 138.113***<br>(31.761)  |
| stay-at-home day              | 0.064**<br>(0.026)    | 0.030*<br>(0.016)   | 0.280<br>(0.199)        |
| business closure day          | -0.005<br>(0.028)     | 0.087***<br>(0.017) | 0.071<br>(0.201)        |
| day -10                       | 0.335<br>(0.279)      | 0.379<br>(0.274)    | 2.329*<br>(1.311)       |
| day -9                        | 0.268<br>(0.281)      | 0.282<br>(0.268)    | 1.337<br>(1.485)        |
| day -8                        | 0.331<br>(0.265)      | 0.367<br>(0.283)    | 1.470<br>(1.294)        |
| day -7                        | 0.366<br>(0.252)      | 0.482*<br>(0.249)   | 1.157<br>(1.281)        |
| day -6                        | 0.321<br>(0.249)      | 0.400<br>(0.270)    | 1.191<br>(1.515)        |
| day -5                        | 0.028                 | 0.297               | 0.170                   |

---

|        |                   |                     |                   |
|--------|-------------------|---------------------|-------------------|
|        | (0.290)           | (0.282)             | (1.584)           |
| day -4 | 0.419<br>(0.290)  | 0.497*<br>(0.244)   | 1.841<br>(1.330)  |
| day -3 | 0.413<br>(0.257)  | 0.530**<br>(0.225)  | 2.339*<br>(1.321) |
| day -2 | 0.343<br>(0.236)  | 0.370<br>(0.212)    | 2.202<br>(1.416)  |
| day -1 | 0.447*<br>(0.250) | 0.486**<br>(0.209)  | 2.608*<br>(1.274) |
| day 1  | 0.283<br>(0.263)  | 0.628**<br>(0.246)  | 2.565*<br>(1.440) |
| day 2  | 0.249<br>(0.282)  | 0.619**<br>(0.270)  | 2.242<br>(1.458)  |
| day 3  | 0.292<br>(0.281)  | 0.643**<br>(0.244)  | 2.524<br>(1.684)  |
| day 4  | 0.263<br>(0.303)  | 0.696**<br>(0.242)  | 2.124<br>(1.684)  |
| day 5  | 0.085<br>(0.318)  | 0.710***<br>(0.227) | 1.392<br>(1.676)  |
| day 6  | 0.115<br>(0.311)  | 0.696***<br>(0.226) | 1.437<br>(1.686)  |
| day 7  | 0.120<br>(0.323)  | 0.553*<br>(0.259)   | 1.548<br>(1.825)  |
| day 8  | 0.263<br>(0.304)  | 0.676***<br>(0.223) | 1.698<br>(1.737)  |
| day 9  | 0.122<br>(0.294)  | 0.518**<br>(0.224)  | 0.849<br>(1.543)  |
| day 10 | 0.198<br>(0.256)  | 0.603**<br>(0.250)  | 1.341<br>(1.515)  |
| day 11 | 0.267<br>(0.238)  | 0.600**<br>(0.261)  | 1.555<br>(1.635)  |

---

|        |                   |                    |                   |
|--------|-------------------|--------------------|-------------------|
| day 12 | 0.144<br>(0.247)  | 0.754**<br>(0.313) | 0.541<br>(1.632)  |
| day 13 | 0.154<br>(0.223)  | 0.630**<br>(0.287) | 0.370<br>(1.608)  |
| day 14 | 0.178<br>(0.222)  | 0.614*<br>(0.310)  | 0.543<br>(1.672)  |
| day 15 | 0.174<br>(0.213)  | 0.524*<br>(0.293)  | 0.331<br>(1.503)  |
| day 16 | 0.208<br>(0.211)  | 0.546*<br>(0.263)  | 0.179<br>(1.484)  |
| day 17 | 0.307<br>(0.223)  | 0.577*<br>(0.271)  | 0.434<br>(1.413)  |
| day 18 | 0.188<br>(0.187)  | 0.437<br>(0.269)   | -0.276<br>(1.134) |
| day 19 | 0.182<br>(0.253)  | 0.175<br>(0.261)   | -0.496<br>(1.290) |
| day 20 | 0.209<br>(0.218)  | 0.306<br>(0.273)   | -0.291<br>(1.269) |
| day 21 | 0.166<br>(0.218)  | 0.325<br>(0.273)   | -0.804<br>(1.076) |
| day 22 | 0.189<br>(0.218)  | 0.284<br>(0.281)   | -0.297<br>(1.272) |
| day 23 | 0.114<br>(0.181)  | 0.255<br>(0.263)   | -0.703<br>(1.153) |
| day 24 | 0.100<br>(0.208)  | 0.196<br>(0.262)   | -0.482<br>(1.194) |
| day 25 | 0.116<br>(0.193)  | 0.241<br>(0.236)   | 0.124<br>(1.207)  |
| day 26 | -0.012<br>(0.143) | 0.081<br>(0.182)   | -0.312<br>(1.047) |

---

|              |                      |                      |                        |
|--------------|----------------------|----------------------|------------------------|
| day 27       | -0.069<br>(0.142)    | 0.103<br>(0.188)     | -0.328<br>(0.829)      |
| day 28       | -0.120<br>(0.173)    | 0.025<br>(0.192)     | -0.311<br>(0.844)      |
| day 29       | -0.032<br>(0.131)    | 0.096<br>(0.164)     | 0.338<br>(0.940)       |
| day 30       | -0.100<br>(0.106)    | 0.006<br>(0.148)     | 0.210<br>(0.930)       |
| day 31       | -0.051<br>(0.125)    | 0.049<br>(0.154)     | 0.394<br>(0.835)       |
| day 32       | -0.034<br>(0.120)    | 0.047<br>(0.148)     | 0.379<br>(0.774)       |
| day 33       | -0.161<br>(0.138)    | 0.050<br>(0.148)     | -0.270<br>(0.705)      |
| day 34       | -0.120<br>(0.116)    | 0.154<br>(0.162)     | -0.176<br>(0.730)      |
| day 35       | -0.129<br>(0.143)    | 0.043<br>(0.122)     | -0.488<br>(0.628)      |
| day 36       | -0.049<br>(0.150)    | 0.104<br>(0.110)     | -0.329<br>(0.737)      |
| day 37       | -0.137<br>(0.122)    | 0.024<br>(0.112)     | -0.676<br>(0.719)      |
| day 38       | -0.205*<br>(0.108)   | -0.007<br>(0.104)    | -0.314<br>(0.600)      |
| day 39       | -0.132<br>(0.093)    | 0.060<br>(0.111)     | -0.319<br>(0.579)      |
| day 40       | -0.140<br>(0.091)    | 0.043<br>(0.119)     | -0.574<br>(0.640)      |
| Constant     | 30.186***<br>(8.618) | 25.208***<br>(7.743) | 220.637***<br>(47.945) |
| Observations | 3,164                | 3,164                | 3,164                  |

---

|                                 |       |       |       |
|---------------------------------|-------|-------|-------|
| R <sup>2</sup>                  | 0.619 | 0.660 | 0.774 |
| Adjusted R <sup>2</sup>         | 0.609 | 0.651 | 0.767 |
| Residual Std. Error (df = 3078) | 0.624 | 0.589 | 3.065 |

---

*Note:* \*p<0.1; \*\*p<0.05; \*\*\*p<0.01

**S10 Table. Regression table.** Event Study regression summary statistics of fig. 3 for later states only, i.e. all states except NY, NJ, MA, CT, MI, DC, RI, IL, WA, PA, GA, VT, MD, FL, LA).

|                        | <i>Dependent variable:</i> |                      |                        |
|------------------------|----------------------------|----------------------|------------------------|
|                        | confirmed cases            | deaths               | hospitalization        |
|                        | (1)                        | (2)                  | (3)                    |
| confirmed cases delay  | 0.435***<br>(0.037)        |                      |                        |
| confirmed cases growth | 0.00000<br>(0.00002)       |                      |                        |
| deaths delay           |                            | 0.473***<br>(0.041)  |                        |
| deaths growth          |                            | 0.0003<br>(0.0003)   |                        |
| hospitalization delay  |                            |                      | 0.491***<br>(0.065)    |
| hospitalization growth |                            |                      | 0.134***<br>(0.038)    |
| new test rate          | 64.443***<br>(19.220)      | 40.579**<br>(15.755) | 152.186***<br>(50.397) |
| precipitation          | -0.004**<br>(0.001)        | -0.007***<br>(0.002) | -0.008<br>(0.006)      |
| temperature            | 0.018***<br>(0.004)        | 0.006<br>(0.006)     | 0.082***<br>(0.015)    |
| retail and recreation  | -1.804<br>(1.946)          | 2.654<br>(1.581)     | -0.137<br>(7.024)      |
| grocery and pharmacy   | 3.598<br>(2.720)           | -3.414<br>(2.406)    | -9.419<br>(12.807)     |
| parks                  | 0.294**<br>(0.110)         | 0.235***<br>(0.084)  | 0.785***<br>(0.238)    |
| transit stations       | -0.622<br>(0.473)          | 0.351<br>(0.513)     | -1.551<br>(1.783)      |



|                               |                       |                        |                        |
|-------------------------------|-----------------------|------------------------|------------------------|
| workplaces                    | 1.581<br>(0.966)      | 2.478***<br>(0.829)    | 8.994***<br>(3.228)    |
| residential                   | -23.420<br>(14.672)   | -28.435**<br>(12.870)  | -154.735**<br>(63.285) |
| grocery and pharmacy squared  | -1.959<br>(1.229)     | 1.178<br>(1.062)       | 2.844<br>(5.674)       |
| retail and recreation squared | 0.360<br>(1.138)      | -2.322***<br>(0.849)   | -1.976<br>(3.731)      |
| parks squared                 | -0.069***<br>(0.023)  | -0.037**<br>(0.018)    | -0.138**<br>(0.053)    |
| transit stations squared      | 0.595*<br>(0.320)     | 0.009<br>(0.301)       | 1.473<br>(1.161)       |
| workplaces squared            | -1.467**<br>(0.702)   | -1.803***<br>(0.635)   | -8.096***<br>(2.287)   |
| residential squared           | 11.549*<br>(6.592)    | 14.558**<br>(5.815)    | 73.529**<br>(28.528)   |
| stay-at-home day              | 0.00004<br>(0.00003)  | 0.00004<br>(0.00003)   | -0.0001<br>(0.0001)    |
| business closure day          | 0.0001**<br>(0.00003) | 0.0001***<br>(0.00003) | 0.00004<br>(0.0001)    |
| day -10                       | 0.298***<br>(0.100)   | 0.480***<br>(0.128)    | 1.080*<br>(0.552)      |
| day -9                        | 0.264**<br>(0.100)    | 0.544***<br>(0.147)    | 1.324**<br>(0.601)     |
| day -8                        | 0.286***<br>(0.100)   | 0.495***<br>(0.169)    | 1.148*<br>(0.588)      |
| day -7                        | 0.228**<br>(0.095)    | 0.519***<br>(0.151)    | 1.047*<br>(0.596)      |
| day -6                        | 0.321***<br>(0.110)   | 0.590***<br>(0.143)    | 1.446*<br>(0.715)      |

---

|        |                     |                     |                    |
|--------|---------------------|---------------------|--------------------|
| day -5 | 0.379***<br>(0.108) | 0.647***<br>(0.138) | 1.576**<br>(0.712) |
| day -4 | 0.275**<br>(0.105)  | 0.591***<br>(0.134) | 1.254*<br>(0.703)  |
| day -3 | 0.286**<br>(0.124)  | 0.652***<br>(0.148) | 1.612*<br>(0.878)  |
| day -2 | 0.351***<br>(0.128) | 0.674***<br>(0.127) | 1.836**<br>(0.890) |
| day -1 | 0.301**<br>(0.121)  | 0.649***<br>(0.146) | 1.701*<br>(0.864)  |
| day 1  | 0.347**<br>(0.143)  | 0.687***<br>(0.170) | 1.665*<br>(0.901)  |
| day 2  | 0.375**<br>(0.143)  | 0.597***<br>(0.172) | 1.547*<br>(0.809)  |
| day 3  | 0.337**<br>(0.144)  | 0.403**<br>(0.191)  | 1.191<br>(0.779)   |
| day 4  | 0.235<br>(0.141)    | 0.387**<br>(0.175)  | 0.984<br>(0.796)   |
| day 5  | 0.306**<br>(0.138)  | 0.375*<br>(0.187)   | 0.977<br>(0.712)   |
| day 6  | 0.272**<br>(0.129)  | 0.271<br>(0.169)    | 0.586<br>(0.615)   |
| day 7  | 0.141<br>(0.120)    | 0.103<br>(0.159)    | 0.236<br>(0.550)   |
| day 8  | 0.165<br>(0.117)    | 0.275<br>(0.168)    | 0.397<br>(0.473)   |
| day 9  | 0.221*<br>(0.116)   | 0.395**<br>(0.170)  | 0.464<br>(0.385)   |
| day 10 | 0.149<br>(0.111)    | 0.249<br>(0.179)    | 0.135<br>(0.365)   |
| day 11 | 0.100               | 0.250               | -0.131             |

---

|        |                   |                   |                   |
|--------|-------------------|-------------------|-------------------|
|        | (0.130)           | (0.185)           | (0.417)           |
| day 12 | 0.121<br>(0.112)  | 0.362*<br>(0.179) | -0.017<br>(0.391) |
| day 13 | 0.083<br>(0.110)  | 0.205<br>(0.159)  | -0.347<br>(0.440) |
| day 14 | -0.050<br>(0.105) | 0.123<br>(0.154)  | -0.699<br>(0.471) |
| day 15 | 0.077<br>(0.106)  | 0.116<br>(0.127)  | -0.289<br>(0.429) |
| day 16 | 0.083<br>(0.128)  | 0.169<br>(0.150)  | -0.301<br>(0.433) |
| day 17 | -0.031<br>(0.116) | 0.183<br>(0.155)  | -0.297<br>(0.449) |
| day 18 | -0.038<br>(0.123) | 0.236<br>(0.194)  | -0.275<br>(0.369) |
| day 19 | 0.009<br>(0.137)  | 0.207<br>(0.165)  | -0.150<br>(0.376) |
| day 20 | 0.064<br>(0.129)  | 0.252<br>(0.180)  | -0.081<br>(0.322) |
| day 21 | -0.020<br>(0.147) | 0.198<br>(0.170)  | -0.384<br>(0.303) |
| day 22 | 0.092<br>(0.135)  | 0.249<br>(0.162)  | -0.007<br>(0.305) |
| day 23 | 0.173<br>(0.160)  | 0.289<br>(0.177)  | 0.197<br>(0.348)  |
| day 24 | 0.069<br>(0.125)  | 0.208<br>(0.157)  | -0.215<br>(0.372) |
| day 25 | 0.048<br>(0.129)  | 0.156<br>(0.170)  | -0.059<br>(0.449) |
| day 26 | 0.064<br>(0.119)  | 0.162<br>(0.162)  | 0.019<br>(0.499)  |

---

|          |                    |                    |                      |
|----------|--------------------|--------------------|----------------------|
| day 27   | 0.015<br>(0.105)   | 0.193<br>(0.155)   | -0.054<br>(0.464)    |
| day 28   | 0.001<br>(0.088)   | 0.190<br>(0.137)   | 0.039<br>(0.524)     |
| day 29   | 0.026<br>(0.080)   | 0.339**<br>(0.137) | 0.369<br>(0.484)     |
| day 30   | 0.062<br>(0.102)   | 0.303**<br>(0.138) | 0.395<br>(0.417)     |
| day 31   | 0.039<br>(0.105)   | 0.258**<br>(0.127) | 0.203<br>(0.373)     |
| day 32   | 0.026<br>(0.097)   | 0.264**<br>(0.129) | 0.213<br>(0.392)     |
| day 33   | -0.003<br>(0.098)  | 0.218*<br>(0.125)  | 0.366<br>(0.413)     |
| day 34   | -0.071<br>(0.085)  | 0.154<br>(0.120)   | 0.277<br>(0.405)     |
| day 35   | -0.114<br>(0.079)  | 0.114<br>(0.133)   | 0.224<br>(0.457)     |
| day 36   | -0.041<br>(0.098)  | 0.108<br>(0.121)   | 0.348<br>(0.439)     |
| day 37   | -0.107<br>(0.084)  | 0.161<br>(0.112)   | 0.255<br>(0.417)     |
| day 38   | -0.157*<br>(0.082) | 0.113<br>(0.121)   | 0.176<br>(0.378)     |
| day 39   | -0.164*<br>(0.081) | 0.096<br>(0.122)   | 0.037<br>(0.399)     |
| day 40   | -0.100<br>(0.080)  | 0.135<br>(0.115)   | 0.137<br>(0.339)     |
| Constant | 8.872<br>(8.803)   | 12.541*<br>(7.334) | 84.933**<br>(39.655) |

---

---

|                                 |       |       |       |
|---------------------------------|-------|-------|-------|
| Observations                    | 6,914 | 6,914 | 6,914 |
| R <sup>2</sup>                  | 0.687 | 0.525 | 0.631 |
| Adjusted R <sup>2</sup>         | 0.682 | 0.518 | 0.626 |
| Residual Std. Error (df = 6807) | 0.563 | 0.692 | 2.316 |

---

*Note:* \*p<0.1; \*\*p<0.05; \*\*\*p<0.01

---

**S11 Table. Regression table.** Event Study regression summary statistics for robustness check (S4. Fig) where we focus on county-level mandates only.

|                        | <i>Dependent variable:</i> |                      |                        |
|------------------------|----------------------------|----------------------|------------------------|
|                        | confirmed cases            | deaths               | hospitalization        |
|                        | (1)                        | (2)                  | (3)                    |
| confirmed cases delay  | 0.195***<br>(0.003)        |                      |                        |
| confirmed cases growth | -0.000***<br>(0.000)       |                      |                        |
| deaths delay           |                            | 0.144***<br>(0.003)  |                        |
| deaths growth          |                            | 0.000*<br>(0.000)    |                        |
| hospitalization delay  |                            |                      | 0.456***<br>(0.003)    |
| hospitalization growth |                            |                      | 0.252***<br>(0.002)    |
| new test rate          | 70.678***<br>(3.122)       | 33.179***<br>(3.772) | 158.236***<br>(19.696) |
| precipitation          | 0.0005<br>(0.0005)         | -0.0003<br>(0.001)   | 0.007**<br>(0.003)     |
| temperature            | -0.019***<br>(0.001)       | -0.015***<br>(0.001) | -0.029***<br>(0.003)   |
| retail and recreation  | -0.080<br>(0.063)          | 0.030<br>(0.076)     | -1.973***<br>(0.398)   |
| grocery and pharmacy   | -0.256***<br>(0.055)       | -0.058<br>(0.067)    | 2.877***<br>(0.349)    |
| parks                  | 0.095***<br>(0.009)        | 0.044***<br>(0.011)  | 0.030<br>(0.059)       |
| transit stations       | -0.060**<br>(0.024)        | -0.052*<br>(0.029)   | 0.716***<br>(0.151)    |

|                               |                         |                      |                          |
|-------------------------------|-------------------------|----------------------|--------------------------|
| workplaces                    | -0.209*<br>(0.120)      | -0.187<br>(0.145)    | -2.603***<br>(0.756)     |
| residential                   | -1.432***<br>(0.096)    | -1.209***<br>(0.116) | -15.006***<br>(0.606)    |
| grocery and pharmacy squared  | 0.212***<br>(0.043)     | 0.079<br>(0.052)     | -2.125***<br>(0.273)     |
| retail and recreation squared | -0.153***<br>(0.053)    | -0.120*<br>(0.064)   | 0.809**<br>(0.332)       |
| parks squared                 | -0.039***<br>(0.004)    | -0.020***<br>(0.004) | -0.088***<br>(0.023)     |
| transit stations squared      | 0.051**<br>(0.020)      | 0.033<br>(0.024)     | -0.162<br>(0.128)        |
| workplaces squared            | 0.098<br>(0.108)        | 0.115<br>(0.130)     | 3.676***<br>(0.681)      |
| residential squared           | 1.394***<br>(0.088)     | 1.149***<br>(0.107)  | 13.860***<br>(0.557)     |
| stay-at-home day              | 0.00001***<br>(0.00000) | 0.00000<br>(0.00000) | -0.00003***<br>(0.00001) |
| business closure day          | 0.00000<br>(0.00002)    | 0.00002<br>(0.00002) | -0.002***<br>(0.0001)    |
| day -10                       | 0.330***<br>(0.037)     | 0.135***<br>(0.045)  | 0.700***<br>(0.234)      |
| day -9                        | 0.357***<br>(0.037)     | 0.069<br>(0.045)     | 0.732***<br>(0.235)      |
| day -8                        | 0.372***<br>(0.037)     | 0.085*<br>(0.045)    | 0.722***<br>(0.232)      |
| day -7                        | 0.411***<br>(0.037)     | 0.126***<br>(0.044)  | 0.763***<br>(0.232)      |
| day -6                        | 0.463***<br>(0.037)     | 0.187***<br>(0.045)  | 0.864***<br>(0.232)      |
| day -5                        | 0.517***                | 0.219***             | 0.875***                 |

---

|        |                     |                     |                     |
|--------|---------------------|---------------------|---------------------|
|        | (0.037)             | (0.044)             | (0.232)             |
| day -4 | 0.572***<br>(0.037) | 0.305***<br>(0.044) | 0.947***<br>(0.232) |
| day -3 | 0.634***<br>(0.037) | 0.284***<br>(0.045) | 1.048***<br>(0.234) |
| day -2 | 0.673***<br>(0.037) | 0.365***<br>(0.045) | 1.121***<br>(0.235) |
| day -1 | 0.719***<br>(0.038) | 0.443***<br>(0.045) | 1.176***<br>(0.237) |
| day 1  | 0.492***<br>(0.048) | 0.177***<br>(0.058) | 1.027***<br>(0.303) |
| day 2  | 0.440***<br>(0.048) | 0.140**<br>(0.058)  | 1.152***<br>(0.303) |
| day 3  | 0.406***<br>(0.048) | 0.192***<br>(0.058) | 1.300***<br>(0.304) |
| day 4  | 0.437***<br>(0.048) | 0.261***<br>(0.058) | 1.517***<br>(0.303) |
| day 5  | 0.446***<br>(0.048) | 0.214***<br>(0.058) | 1.460***<br>(0.302) |
| day 6  | 0.499***<br>(0.049) | 0.226***<br>(0.059) | 1.688***<br>(0.308) |
| day 7  | 0.480***<br>(0.049) | 0.251***<br>(0.059) | 1.732***<br>(0.308) |
| day 8  | 0.472***<br>(0.049) | 0.244***<br>(0.059) | 1.886***<br>(0.309) |
| day 9  | 0.471***<br>(0.050) | 0.261***<br>(0.060) | 1.713***<br>(0.314) |
| day 10 | 0.482***<br>(0.050) | 0.264***<br>(0.061) | 1.692***<br>(0.316) |
| day 11 | 0.454***<br>(0.051) | 0.269***<br>(0.061) | 1.764***<br>(0.319) |

---



|        |                     |                     |                     |
|--------|---------------------|---------------------|---------------------|
| day 12 | 0.441***<br>(0.050) | 0.289***<br>(0.061) | 1.919***<br>(0.317) |
| day 13 | 0.445***<br>(0.051) | 0.322***<br>(0.062) | 2.027***<br>(0.322) |
| day 14 | 0.415***<br>(0.051) | 0.297***<br>(0.061) | 1.877***<br>(0.320) |
| day 15 | 0.385***<br>(0.051) | 0.264***<br>(0.062) | 1.754***<br>(0.323) |
| day 16 | 0.312***<br>(0.051) | 0.274***<br>(0.062) | 1.693***<br>(0.324) |
| day 17 | 0.294***<br>(0.052) | 0.283***<br>(0.062) | 1.656***<br>(0.326) |
| day 18 | 0.329***<br>(0.052) | 0.323***<br>(0.063) | 1.664***<br>(0.329) |
| day 19 | 0.274***<br>(0.052) | 0.318***<br>(0.063) | 1.683***<br>(0.329) |
| day 20 | 0.251***<br>(0.052) | 0.302***<br>(0.063) | 1.632***<br>(0.330) |
| day 21 | 0.224***<br>(0.053) | 0.348***<br>(0.064) | 1.298***<br>(0.332) |
| day 22 | 0.137***<br>(0.053) | 0.355***<br>(0.064) | 1.131***<br>(0.332) |
| day 23 | 0.119**<br>(0.053)  | 0.264***<br>(0.064) | 1.128***<br>(0.335) |
| day 24 | 0.056<br>(0.053)    | 0.278***<br>(0.064) | 1.249***<br>(0.336) |
| day 25 | 0.042<br>(0.054)    | 0.463***<br>(0.065) | 1.102***<br>(0.338) |
| day 26 | 0.061<br>(0.054)    | 0.474***<br>(0.065) | 0.922***<br>(0.340) |

---

|        |                    |                     |                    |
|--------|--------------------|---------------------|--------------------|
| day 27 | 0.022<br>(0.054)   | 0.542***<br>(0.065) | 0.727**<br>(0.339) |
| day 28 | -0.024<br>(0.054)  | 0.462***<br>(0.065) | 0.594*<br>(0.340)  |
| day 29 | -0.010<br>(0.055)  | 0.488***<br>(0.066) | 0.475<br>(0.345)   |
| day 30 | -0.095*<br>(0.055) | 0.544***<br>(0.067) | 0.426<br>(0.348)   |
| day 31 | -0.060<br>(0.056)  | 0.416***<br>(0.067) | 0.680*<br>(0.350)  |
| day 32 | -0.088<br>(0.056)  | 0.185***<br>(0.067) | 0.472<br>(0.351)   |
| day 33 | -0.085<br>(0.056)  | 0.123*<br>(0.067)   | 0.385<br>(0.350)   |
| day 34 | -0.070<br>(0.055)  | 0.121*<br>(0.067)   | 0.533<br>(0.347)   |
| day 35 | -0.081<br>(0.056)  | 0.230***<br>(0.067) | 0.389<br>(0.351)   |
| day 36 | -0.080<br>(0.055)  | 0.270***<br>(0.067) | 0.323<br>(0.350)   |
| day 37 | -0.023<br>(0.056)  | 0.291***<br>(0.068) | 0.303<br>(0.356)   |
| day 38 | -0.014<br>(0.056)  | 0.313***<br>(0.068) | 0.104<br>(0.353)   |
| day 39 | -0.018<br>(0.056)  | 0.259***<br>(0.068) | 0.076<br>(0.354)   |
| day 40 | 0.059<br>(0.057)   | 0.221***<br>(0.069) | 0.113<br>(0.358)   |
| day 41 | 0.079<br>(0.058)   | 0.256***<br>(0.070) | 0.012<br>(0.365)   |
| day 42 | -0.031             | 0.129*              | -0.267             |

---

|        |                   |                     |                   |
|--------|-------------------|---------------------|-------------------|
|        | (0.058)           | (0.070)             | (0.367)           |
| day 43 | 0.064<br>(0.058)  | 0.189***<br>(0.070) | -0.218<br>(0.366) |
| day 44 | 0.068<br>(0.058)  | 0.189***<br>(0.070) | -0.319<br>(0.364) |
| day 45 | 0.017<br>(0.059)  | 0.190***<br>(0.071) | -0.316<br>(0.370) |
| day 46 | 0.027<br>(0.058)  | 0.232***<br>(0.071) | -0.221<br>(0.369) |
| day 47 | 0.021<br>(0.060)  | 0.238***<br>(0.072) | -0.014<br>(0.376) |
| day 48 | 0.030<br>(0.060)  | 0.226***<br>(0.072) | -0.118<br>(0.376) |
| day 49 | -0.028<br>(0.059) | 0.212***<br>(0.072) | -0.047<br>(0.373) |
| day 50 | -0.015<br>(0.060) | 0.126*<br>(0.072)   | -0.154<br>(0.376) |
| day 51 | -0.071<br>(0.061) | 0.080<br>(0.074)    | -0.299<br>(0.385) |
| day 52 | -0.090<br>(0.061) | 0.089<br>(0.074)    | -0.173<br>(0.386) |
| day 53 | -0.019<br>(0.061) | 0.102<br>(0.073)    | -0.122<br>(0.383) |
| day 54 | -0.065<br>(0.062) | 0.123<br>(0.075)    | -0.065<br>(0.389) |
| day 55 | -0.033<br>(0.062) | 0.099<br>(0.074)    | -0.067<br>(0.388) |
| day 56 | -0.019<br>(0.062) | 0.045<br>(0.075)    | 0.034<br>(0.390)  |
| day 57 | -0.059<br>(0.063) | 0.055<br>(0.076)    | 0.004<br>(0.399)  |

---

|        |                     |                      |                   |
|--------|---------------------|----------------------|-------------------|
| day 58 | -0.105<br>(0.064)   | 0.001<br>(0.078)     | -0.030<br>(0.406) |
| day 59 | -0.113*<br>(0.064)  | 0.028<br>(0.077)     | -0.075<br>(0.404) |
| day 60 | -0.081<br>(0.065)   | 0.008<br>(0.079)     | 0.023<br>(0.411)  |
| day 61 | -0.108<br>(0.066)   | 0.035<br>(0.080)     | -0.200<br>(0.418) |
| day 62 | -0.130*<br>(0.067)  | 0.014<br>(0.080)     | -0.274<br>(0.420) |
| day 63 | -0.157**<br>(0.068) | -0.057<br>(0.082)    | -0.184<br>(0.427) |
| day 64 | -0.138**<br>(0.069) | -0.115<br>(0.083)    | -0.314<br>(0.433) |
| day 65 | -0.147**<br>(0.070) | -0.130<br>(0.084)    | -0.407<br>(0.441) |
| day 66 | -0.179**<br>(0.070) | -0.239***<br>(0.084) | -0.345<br>(0.441) |
| day 67 | -0.149**<br>(0.070) | -0.178**<br>(0.085)  | -0.327<br>(0.443) |
| day 68 | -0.174**<br>(0.070) | -0.095<br>(0.085)    | -0.477<br>(0.443) |
| day 69 | -0.034<br>(0.071)   | -0.157*<br>(0.086)   | -0.345<br>(0.450) |
| day 70 | -0.114<br>(0.072)   | -0.376***<br>(0.087) | -0.244<br>(0.454) |

---

|                                  |        |        |        |
|----------------------------------|--------|--------|--------|
| Observations                     | 77,930 | 77,930 | 77,930 |
| R <sup>2</sup>                   | 0.502  | 0.272  | 0.469  |
| Adjusted R <sup>2</sup>          | 0.500  | 0.269  | 0.466  |
| Residual Std. Error (df = 77610) | 0.704  | 0.851  | 4.441  |

---

Note:

\*p<0.1; \*\*p<0.05; \*\*\*p<0.01

**S12 Table. Regression table.** Event Study regression summary statistics for robustness check (fig. 6) where we estimate the effect of lifting mask mandates on COVID-19 outcomes.

|                                     | <i>Dependent variable:</i> |                      |                       |
|-------------------------------------|----------------------------|----------------------|-----------------------|
|                                     | confirmed cases            | deaths               | hospitalization       |
|                                     | (1)                        | (2)                  | (3)                   |
| confirmed cases delay 14days        | 0.613***<br>(0.017)        |                      |                       |
| confirmed cases delay 14days growth | 0.00002<br>(0.0001)        |                      |                       |
| deaths delay 14days                 |                            | 0.575***<br>(0.028)  |                       |
| deaths delay 14days growth          |                            | -0.00005<br>(0.0002) |                       |
| hospitalization delay 14days        |                            |                      | 0.654***<br>(0.017)   |
| hospitalization delay 14days growth |                            |                      | 0.186***<br>(0.029)   |
| new test rate                       | 14.800***<br>(5.457)       | 8.923*<br>(4.646)    | 19.825<br>(13.762)    |
| precipitation avg                   | -0.002***<br>(0.001)       | -0.003***<br>(0.001) | -0.003<br>(0.004)     |
| temperature avg                     | 0.001<br>(0.002)           | -0.004***<br>(0.001) | -0.002<br>(0.008)     |
| people vaccinated per hundred       | -0.048***<br>(0.004)       | -0.039***<br>(0.004) | -0.160***<br>(0.016)  |
| retail and recreation               | -3.840***<br>(0.452)       | -3.348***<br>(1.062) | -18.619***<br>(5.916) |
| grocery and pharmacy                | 5.101***<br>(0.586)        | 3.738***<br>(1.267)  | 17.709**<br>(6.999)   |
| parks                               | 0.114***<br>(0.029)        | 0.143***<br>(0.046)  | 0.809***<br>(0.247)   |

|                              |                       |                        |                         |
|------------------------------|-----------------------|------------------------|-------------------------|
| transit stations             | -0.478**<br>(0.234)   | -0.714*<br>(0.382)     | -1.843<br>(1.436)       |
| workplaces                   | 1.537***<br>(0.369)   | 3.123***<br>(0.569)    | 9.226***<br>(3.102)     |
| residential                  | 12.729**<br>(5.709)   | -10.692<br>(8.634)     | -73.815<br>(44.545)     |
| grocery and pharmacy square  | -2.118***<br>(0.264)  | -1.369**<br>(0.562)    | -7.170**<br>(3.107)     |
| retail and recreation square | 1.814***<br>(0.252)   | 1.350**<br>(0.580)     | 8.810***<br>(3.152)     |
| parks square                 | -0.042***<br>(0.007)  | -0.025**<br>(0.010)    | -0.244***<br>(0.058)    |
| transit stations square      | 0.453***<br>(0.153)   | 0.183<br>(0.207)       | 1.284<br>(0.837)        |
| workplaces square            | -0.397<br>(0.244)     | -1.272***<br>(0.411)   | -5.457**<br>(2.085)     |
| residential square           | -4.168<br>(2.614)     | 6.969*<br>(3.864)      | 38.576*<br>(20.154)     |
| stay-at-home day             | -0.00000<br>(0.00001) | 0.00002**<br>(0.00001) | 0.0001*<br>(0.00003)    |
| business closure day         | -0.00002<br>(0.00001) | -0.00001<br>(0.00001)  | -0.0001***<br>(0.00004) |
| day -45                      | -0.468***<br>(0.157)  | 0.103<br>(0.255)       | -0.873<br>(0.525)       |
| day -44                      | -0.487***<br>(0.151)  | -0.292<br>(0.316)      | -1.350***<br>(0.454)    |
| day -43                      | -0.742***<br>(0.219)  | -0.524<br>(0.388)      | -0.973<br>(1.100)       |
| day -42                      | -0.673***<br>(0.193)  | -0.494<br>(0.387)      | -0.530<br>(0.990)       |
| day -41                      | -0.730***             | -0.670                 | -0.850                  |

---

|         |                      |                     |                      |
|---------|----------------------|---------------------|----------------------|
|         | (0.217)              | (0.410)             | (1.136)              |
| day -40 | -0.658***<br>(0.217) | -0.539<br>(0.546)   | -1.013<br>(1.194)    |
| day -39 | -0.872***<br>(0.267) | -0.934**<br>(0.434) | -2.484***<br>(0.718) |
| day -38 | -0.725**<br>(0.279)  | -0.846*<br>(0.494)  | -2.182***<br>(0.636) |
| day -37 | -0.619*<br>(0.329)   | -0.504**<br>(0.234) | -2.279***<br>(0.673) |
| day -36 | -0.732**<br>(0.318)  | -0.459*<br>(0.259)  | -2.381***<br>(0.593) |
| day -35 | -0.183<br>(0.415)    | -0.174<br>(0.309)   | -1.771*<br>(0.938)   |
| day -34 | -0.572**<br>(0.252)  | -0.319<br>(0.243)   | -2.282***<br>(0.717) |
| day -33 | -0.515*<br>(0.281)   | -0.360<br>(0.277)   | -2.294**<br>(0.923)  |
| day -32 | -0.512**<br>(0.234)  | -0.265<br>(0.199)   | -2.668***<br>(0.964) |
| day -31 | -0.476*<br>(0.239)   | -0.379<br>(0.265)   | -2.779***<br>(1.025) |
| day -30 | -0.418**<br>(0.208)  | -0.532<br>(0.472)   | -2.664**<br>(1.115)  |
| day -29 | -0.530**<br>(0.244)  | -0.749*<br>(0.410)  | -3.288***<br>(1.023) |
| day -28 | -0.494*<br>(0.251)   | -0.814**<br>(0.397) | -3.154***<br>(1.169) |
| day -27 | -0.500*<br>(0.259)   | -0.961**<br>(0.382) | -3.353**<br>(1.302)  |
| day -26 | -0.388<br>(0.236)    | -0.731*<br>(0.404)  | -3.181**<br>(1.469)  |

---

|         |                      |                      |                      |
|---------|----------------------|----------------------|----------------------|
| day -25 | -0.287*<br>(0.162)   | -0.715*<br>(0.410)   | -2.200***<br>(0.665) |
| day -24 | -0.522**<br>(0.256)  | -0.915**<br>(0.375)  | -2.472***<br>(0.619) |
| day -23 | -0.727**<br>(0.308)  | -0.798***<br>(0.266) | -2.583***<br>(0.863) |
| day -22 | -0.641***<br>(0.217) | -0.742***<br>(0.211) | -2.424***<br>(0.632) |
| day -21 | -0.716***<br>(0.235) | -0.862***<br>(0.287) | -2.694***<br>(0.654) |
| day -20 | -0.761***<br>(0.255) | -0.655**<br>(0.258)  | -2.695***<br>(0.659) |
| day -19 | -0.711**<br>(0.318)  | -0.609*<br>(0.338)   | -2.182***<br>(0.685) |
| day -18 | -0.759***<br>(0.255) | -0.595**<br>(0.266)  | -1.963***<br>(0.500) |
| day -17 | -0.709***<br>(0.234) | -0.196<br>(0.317)    | -1.902***<br>(0.524) |
| day -16 | -0.711***<br>(0.172) | 0.118<br>(0.455)     | -1.954***<br>(0.565) |
| day -15 | -0.677***<br>(0.157) | 0.196<br>(0.426)     | -1.943***<br>(0.576) |
| day -14 | -0.584***<br>(0.136) | 0.373<br>(0.445)     | -1.889***<br>(0.548) |
| day -13 | -0.784***<br>(0.278) | 0.075<br>(0.345)     | -1.302<br>(0.845)    |
| day -12 | -0.638**<br>(0.273)  | -0.064<br>(0.322)    | -0.821<br>(0.866)    |
| day -11 | -0.716***<br>(0.252) | -0.169<br>(0.340)    | -1.029<br>(0.722)    |

---



|         |                      |                     |                     |
|---------|----------------------|---------------------|---------------------|
| day -10 | -0.616**<br>(0.263)  | -0.229<br>(0.322)   | -0.958<br>(0.630)   |
| day -9  | -0.636**<br>(0.264)  | -0.136<br>(0.287)   | -0.980<br>(0.637)   |
| day -8  | -0.605**<br>(0.233)  | -0.070<br>(0.266)   | -1.001*<br>(0.534)  |
| day -7  | -0.562**<br>(0.231)  | 0.148<br>(0.323)    | -0.918**<br>(0.434) |
| day -6  | -0.406*<br>(0.204)   | 0.052<br>(0.335)    | -0.833*<br>(0.443)  |
| day -5  | -0.239<br>(0.224)    | 0.108<br>(0.403)    | -0.989**<br>(0.417) |
| day -4  | -0.230<br>(0.207)    | 0.101<br>(0.434)    | -0.985**<br>(0.465) |
| day -3  | -0.272<br>(0.203)    | 0.036<br>(0.351)    | -0.970<br>(0.699)   |
| day -2  | -0.220<br>(0.288)    | -0.254<br>(0.457)   | -0.821<br>(0.767)   |
| day -1  | -0.457***<br>(0.165) | -0.125<br>(0.518)   | -0.812<br>(0.960)   |
| day 1   | -0.380**<br>(0.168)  | -0.413<br>(0.321)   | -0.824<br>(0.903)   |
| day 2   | -0.527**<br>(0.219)  | -0.331<br>(0.302)   | -0.745<br>(0.919)   |
| day 3   | -0.603***<br>(0.221) | -0.099<br>(0.108)   | -0.800<br>(1.062)   |
| day 4   | -0.452***<br>(0.168) | -0.204<br>(0.136)   | -0.588<br>(1.123)   |
| day 5   | -0.557***<br>(0.155) | -0.539**<br>(0.268) | -0.537<br>(1.024)   |
| day 6   | -0.100               | -0.611***           | -0.503              |

---

|        |                      |                      |                     |
|--------|----------------------|----------------------|---------------------|
|        | (0.329)              | (0.191)              | (0.973)             |
| day 7  | -0.372***<br>(0.118) | -0.928**<br>(0.348)  | -0.565<br>(0.924)   |
| day 8  | -0.471***<br>(0.171) | -0.900**<br>(0.432)  | -1.065<br>(1.108)   |
| day 9  | -0.345**<br>(0.157)  | -0.798**<br>(0.376)  | -0.863<br>(0.802)   |
| day 10 | -0.348***<br>(0.125) | -0.908**<br>(0.356)  | -0.976<br>(0.697)   |
| day 11 | -0.345***<br>(0.119) | -0.956**<br>(0.382)  | -1.179**<br>(0.548) |
| day 12 | -0.317***<br>(0.113) | -0.984***<br>(0.362) | -1.163**<br>(0.444) |
| day 13 | -0.316***<br>(0.107) | -0.946***<br>(0.350) | -1.179**<br>(0.481) |
| day 14 | -0.288***<br>(0.102) | -0.530**<br>(0.211)  | -1.067**<br>(0.523) |
| day 15 | -0.236*<br>(0.124)   | -0.482**<br>(0.205)  | -0.847<br>(0.700)   |
| day 16 | -0.130<br>(0.127)    | -0.342**<br>(0.158)  | -0.068<br>(0.555)   |
| day 17 | -0.128<br>(0.109)    | -0.350**<br>(0.138)  | -0.013<br>(0.621)   |
| day 18 | -0.234*<br>(0.135)   | -0.443*<br>(0.240)   | -0.899<br>(1.001)   |
| day 19 | -0.231*<br>(0.125)   | -0.463<br>(0.290)    | -0.537<br>(1.015)   |
| day 20 | -0.216*<br>(0.116)   | -0.303<br>(0.242)    | -0.330<br>(0.909)   |
| day 21 | -0.198**<br>(0.097)  | -0.245<br>(0.224)    | 0.023<br>(0.803)    |

---

|        |                     |                      |                      |
|--------|---------------------|----------------------|----------------------|
| day 22 | -0.226*<br>(0.120)  | -0.298<br>(0.210)    | 0.301<br>(0.766)     |
| day 23 | -0.211<br>(0.163)   | -0.228<br>(0.222)    | 0.559<br>(0.729)     |
| day 24 | -0.147<br>(0.186)   | -0.240<br>(0.263)    | 0.721<br>(0.760)     |
| day 25 | -0.248*<br>(0.125)  | -0.449**<br>(0.189)  | 0.487<br>(0.938)     |
| day 26 | -0.196**<br>(0.084) | -0.316**<br>(0.149)  | 0.603<br>(0.962)     |
| day 27 | -0.148**<br>(0.068) | -0.291**<br>(0.120)  | 0.588<br>(0.907)     |
| day 28 | -0.335*<br>(0.197)  | -0.493**<br>(0.236)  | -1.063***<br>(0.337) |
| day 29 | -0.170**<br>(0.079) | -0.340*<br>(0.189)   | -0.451**<br>(0.182)  |
| day 30 | -0.139<br>(0.115)   | -0.340<br>(0.232)    | -0.589**<br>(0.259)  |
| day 31 | -0.174**<br>(0.085) | -0.255<br>(0.166)    | -0.834**<br>(0.334)  |
| day 32 | -0.091*<br>(0.053)  | -0.259**<br>(0.113)  | -0.810**<br>(0.345)  |
| day 33 | -0.164<br>(0.098)   | -0.268***<br>(0.090) | -1.020*<br>(0.599)   |
| day 34 | -0.076<br>(0.079)   | -0.211***<br>(0.061) | -1.068<br>(0.785)    |
| day 35 | -0.097<br>(0.105)   | -0.217**<br>(0.088)  | -1.157<br>(0.963)    |
| day 36 | -0.070<br>(0.081)   | -0.278***<br>(0.070) | -1.461<br>(1.113)    |

---

|                                  |                       |                      |                    |
|----------------------------------|-----------------------|----------------------|--------------------|
| day 37                           | -0.040<br>(0.079)     | -0.237***<br>(0.083) | -1.623<br>(1.192)  |
| day 38                           | -0.055<br>(0.068)     | -0.260**<br>(0.101)  | -1.777<br>(1.192)  |
| day 39                           | -0.001<br>(0.079)     | -0.253**<br>(0.105)  | -1.531<br>(1.212)  |
| day 40                           | 0.013<br>(0.078)      | -0.248***<br>(0.076) | -1.285<br>(1.027)  |
| day 41                           | 0.079<br>(0.049)      | -0.187**<br>(0.083)  | -0.972<br>(0.919)  |
| day 42                           | 0.074<br>(0.053)      | -0.125<br>(0.125)    | -0.811<br>(0.829)  |
| day 43                           | 0.035<br>(0.067)      | -0.109<br>(0.134)    | -0.614<br>(0.779)  |
| day 44                           | 0.068<br>(0.101)      | -0.160<br>(0.153)    | -0.537<br>(0.616)  |
| day 45                           | 0.101<br>(0.075)      | -0.167<br>(0.149)    | -0.403<br>(0.407)  |
| Constant                         | -11.904***<br>(3.094) | 0.838<br>(4.721)     | 28.154<br>(23.745) |
| Observations                     | 19,502                | 19,502               | 19,502             |
| R <sup>2</sup>                   | 0.793                 | 0.657                | 0.716              |
| Adjusted R <sup>2</sup>          | 0.792                 | 0.654                | 0.714              |
| Residual Std. Error (df = 19339) | 0.456                 | 0.588                | 2.416              |

*Note:*

\*p<0.1; \*\*p<0.05; \*\*\*p<0.01

**S13 Table. Regression table.** Event Study regression summary statistics of testing rate event study shown in S2. Fig.

|                               | <i>Dependent variable:</i> |
|-------------------------------|----------------------------|
|                               | full formula               |
| precipitation                 | 0.00000<br>(0.00000)       |
| temperature                   | 0.00001<br>(0.00001)       |
| retail and recreation         | -0.003*<br>(0.002)         |
| grocery and pharmacy          | 0.005***<br>(0.001)        |
| parks                         | 0.0001<br>(0.0001)         |
| transit stations              | -0.0005<br>(0.001)         |
| workplaces                    | 0.002<br>(0.001)           |
| residential                   | 0.038**<br>(0.017)         |
| grocery and pharmacy squared  | -0.002***<br>(0.001)       |
| retail and recreation squared | 0.001<br>(0.001)           |
| parks squared                 | -0.00005**<br>(0.00002)    |
| transit stations squared      | 0.001*<br>(0.0005)         |
| workplaces squared            | -0.001<br>(0.001)          |
| residential squared           | -0.016**<br>(0.007)        |

|         |                      |
|---------|----------------------|
| day -10 | -0.00002<br>(0.0001) |
| day -9  | 0.0001<br>(0.0001)   |
| day -8  | 0.00004<br>(0.0001)  |
| day -7  | 0.0001<br>(0.0001)   |
| day -6  | -0.0001<br>(0.0001)  |
| day -5  | -0.0001<br>(0.0001)  |
| day -4  | 0.00005<br>(0.0001)  |
| day -3  | -0.00005<br>(0.0001) |
| day -2  | 0.0001*<br>(0.0001)  |
| day -1  | -0.0001<br>(0.0001)  |
| day 1   | -0.00003<br>(0.0001) |
| day 2   | -0.0001<br>(0.0001)  |
| day 3   | -0.0001<br>(0.0001)  |
| day 4   | 0.0002<br>(0.0001)   |
| day 5   | 0.0001<br>(0.0001)   |

---

|        |                      |
|--------|----------------------|
| day 6  | 0.0001<br>(0.0001)   |
| day 7  | 0.00004<br>(0.0001)  |
| day 8  | 0.0001<br>(0.0001)   |
| day 9  | -0.00003<br>(0.0001) |
| day 10 | 0.00002<br>(0.0001)  |
| day 11 | 0.0002<br>(0.0002)   |
| day 12 | 0.0001<br>(0.0001)   |
| day 13 | 0.0001<br>(0.0001)   |
| day 14 | 0.00002<br>(0.0001)  |
| day 15 | -0.0001<br>(0.0001)  |
| day 16 | -0.0001<br>(0.0001)  |
| day 17 | -0.0001<br>(0.0001)  |
| day 18 | 0.0001<br>(0.0002)   |
| day 19 | 0.0004*<br>(0.0002)  |
| day 20 | -0.00001<br>(0.0001) |
| day 21 | -0.0001              |

---

|        |                        |
|--------|------------------------|
|        | (0.0001)               |
| day 22 | -0.0002<br>(0.0001)    |
| day 23 | -0.0002*<br>(0.0001)   |
| day 24 | -0.0002**<br>(0.0001)  |
| day 25 | -0.0001<br>(0.0001)    |
| day 26 | 0.0001<br>(0.0001)     |
| day 27 | 0.0001<br>(0.0001)     |
| day 28 | -0.0003**<br>(0.0001)  |
| day 29 | -0.0001<br>(0.0001)    |
| day 30 | -0.0002*<br>(0.0001)   |
| day 31 | -0.0003**<br>(0.0001)  |
| day 32 | -0.0001<br>(0.0001)    |
| day 33 | 0.0001<br>(0.0003)     |
| day 34 | 0.0001<br>(0.0001)     |
| day 35 | -0.0002**<br>(0.0001)  |
| day 36 | -0.0003***<br>(0.0001) |

---



|          |                      |
|----------|----------------------|
| day 37   | -0.0002<br>(0.0001)  |
| day 38   | -0.0001<br>(0.0001)  |
| day 39   | -0.00003<br>(0.0001) |
| day 40   | -0.0001<br>(0.0001)  |
| Constant | -0.027***<br>(0.010) |

---

|                         |                   |
|-------------------------|-------------------|
| Observations            | 10,078            |
| R <sup>2</sup>          | 0.501             |
| Adjusted R <sup>2</sup> | 0.495             |
| Residual Std. Error     | 0.001 (df = 9961) |

---

*Note:* \*p<0.1; \*\*p<0.05; \*\*\*p<0.01

**S14 Table. Regression table.** Event Study regression summary statistics for robustness check comparing controlling for cases, deaths and testing rate (S7. Fig).

|                              | <i>Dependent variable:</i>       |                                                |
|------------------------------|----------------------------------|------------------------------------------------|
|                              | Mask Adherence<br>(all controls) | Mask Adherence<br>(no cases, deaths and tests) |
| deaths                       | 7.552<br>(3.519)                 |                                                |
| confirmed cases              | 0.113<br>(0.073)                 |                                                |
| new test rate                | -25.681<br>(14.831)              |                                                |
| grocery and pharmacy         | 0.160<br>(0.074)                 | 0.184<br>(0.096)                               |
| parks                        | 0.005<br>(0.009)                 | 0.012<br>(0.017)                               |
| transit stations             | -0.014<br>(0.030)                | -0.028<br>(0.055)                              |
| workplaces                   | 0.024<br>(0.121)                 | 0.129<br>(0.155)                               |
| residential                  | 0.603<br>(0.388)                 | 1.522*<br>(0.587)                              |
| grocery and pharmacy square  | -0.001<br>(0.002)                | -0.002<br>(0.002)                              |
| retail and recreation square | 0.003**<br>(0.001)               | 0.004**<br>(0.001)                             |
| parks square                 | 0.0001<br>(0.00004)              | 0.0002*<br>(0.0001)                            |
| transit stations square      | 0.002<br>(0.001)                 | 0.003*<br>(0.001)                              |
| workplaces square            | -0.003<br>(0.003)                | -0.001<br>(0.004)                              |

|                    |                   |                   |
|--------------------|-------------------|-------------------|
| residential square | -0.010<br>(0.022) | -0.050<br>(0.039) |
| day -8             | -2.754<br>(2.695) | 0.075<br>(0.923)  |
| day -7             | -4.122<br>(3.912) | -0.786<br>(1.331) |
| day -6             | -3.599<br>(3.670) | 0.447<br>(1.733)  |
| day -5             | -3.251<br>(4.414) | 0.905<br>(1.795)  |
| day -4             | -3.774<br>(4.184) | 0.340<br>(1.224)  |
| day -3             | -3.953<br>(3.944) | 0.706<br>(0.890)  |
| day -2             | -3.885<br>(3.836) | -0.341<br>(1.161) |
| day -1             | -2.264<br>(2.695) | 0.756<br>(0.866)  |
| day 0              | -3.137<br>(3.065) | -0.280<br>(1.281) |
| day 1              | -2.550<br>(2.372) | 0.678<br>(0.527)  |
| day 2              | -3.244<br>(2.511) | -0.279<br>(1.276) |
| day 3              | -2.915<br>(2.247) | -0.197<br>(1.010) |
| day 4              | -2.293<br>(2.602) | 0.936<br>(1.573)  |
| day 5              | -1.656<br>(1.836) | 1.048<br>(1.336)  |
| day 6              | -1.150            | 1.626             |

---

|          |                      |                      |
|----------|----------------------|----------------------|
|          | (2.238)              | (2.135)              |
| day 7    | 1.319<br>(1.827)     | 3.889<br>(2.240)     |
| day 8    | 2.357<br>(1.220)     | 5.019<br>(2.431)     |
| day 9    | 3.295<br>(1.560)     | 5.668<br>(3.124)     |
| day 10   | 5.259*<br>(1.716)    | 7.243<br>(4.020)     |
| day 11   | 8.908**<br>(2.656)   | 10.077*<br>(3.937)   |
| day 12   | 9.934<br>(4.691)     | 7.471<br>(6.907)     |
| day 13   | 21.114**<br>(5.825)  | 16.732*<br>(6.980)   |
| Constant | 70.346***<br>(6.894) | 62.648***<br>(8.436) |

---

|                         |                  |                  |
|-------------------------|------------------|------------------|
| Observations            | 323              | 323              |
| R <sup>2</sup>          | 0.934            | 0.903            |
| Adjusted R <sup>2</sup> | 0.925            | 0.890            |
| Residual Std. Error     | 2.538 (df = 281) | 3.070 (df = 284) |

---

*Note:*

\*p<0.1; \*\*p<0.05; \*\*\*p<0.01

**S15 Table. Regression table.** Event Study regression summary statistics for robustness check after mask mandate lifting comparing controlling for cases, deaths and testing rate (S8. Fig).

|                               | <i>Dependent variable:</i>       |                                                |
|-------------------------------|----------------------------------|------------------------------------------------|
|                               | Mask Adherence<br>(all controls) | Mask Adherence<br>(no cases, deaths and tests) |
| deaths                        | 1.026***<br>(0.267)              |                                                |
| confirmed cases               | 0.005<br>(0.005)                 |                                                |
| new test rate                 | -7.043<br>(10.196)               |                                                |
| people vaccinated per hundred | 0.032<br>(0.024)                 |                                                |
| precipitation avg             | -0.006<br>(0.004)                | -0.008*<br>(0.005)                             |
| temperature avg               | -0.030*<br>(0.016)               | -0.028*<br>(0.016)                             |
| retail and recreation         | 8.965<br>(5.927)                 | 7.067<br>(6.075)                               |
| grocery and pharmacy          | -12.881***<br>(3.582)            | -12.197***<br>(3.744)                          |
| parks                         | 2.104**<br>(0.966)               | 2.492**<br>(1.032)                             |
| transit stations              | 11.585**<br>(5.665)              | 11.328*<br>(5.947)                             |
| workplaces                    | -16.563*<br>(8.684)              | -15.012*<br>(8.908)                            |
| residential                   | 413.874***<br>(74.551)           | 452.016***<br>(78.833)                         |
| grocery and pharmacy square   | 4.966**<br>(2.024)               | 5.559**<br>(2.087)                             |

|                              |                         |                         |
|------------------------------|-------------------------|-------------------------|
| retail and recreation square | -1.921<br>(3.303)       | -1.250<br>(3.322)       |
| parks square                 | -0.522*<br>(0.295)      | -0.608*<br>(0.318)      |
| transit stations square      | -9.145**<br>(3.427)     | -9.303**<br>(3.588)     |
| workplaces square            | 15.746***<br>(5.015)    | 15.339***<br>(5.187)    |
| residential square           | -173.674***<br>(31.891) | -188.029***<br>(33.784) |
| day -45                      | 1.249<br>(1.144)        | 1.112<br>(1.191)        |
| day -44                      | 1.280<br>(1.152)        | 1.219<br>(1.232)        |
| day -43                      | 2.320**<br>(0.964)      | 2.162**<br>(0.983)      |
| day -42                      | 2.001*<br>(1.115)       | 1.794<br>(1.191)        |
| day -41                      | 2.518**<br>(1.139)      | 2.175*<br>(1.104)       |
| day -40                      | 2.086**<br>(0.951)      | 1.871*<br>(1.037)       |
| day -39                      | 1.640**<br>(0.725)      | 1.465*<br>(0.853)       |
| day -38                      | 1.536**<br>(0.639)      | 1.423*<br>(0.777)       |
| day -37                      | 1.560**<br>(0.587)      | 1.517**<br>(0.687)      |
| day -36                      | 2.240***<br>(0.687)     | 2.185***<br>(0.711)     |
| day -35                      | 2.386***                | 2.600***                |

---

|         |                     |                     |
|---------|---------------------|---------------------|
|         | (0.806)             | (0.865)             |
| day -34 | 2.936***<br>(0.870) | 3.012***<br>(0.918) |
| day -33 | 2.951***<br>(0.868) | 2.843***<br>(0.811) |
| day -32 | 2.784***<br>(0.872) | 2.658***<br>(0.826) |
| day -31 | 2.213**<br>(0.830)  | 1.968**<br>(0.785)  |
| day -30 | 2.680***<br>(0.848) | 2.296***<br>(0.841) |
| day -29 | 2.462***<br>(0.825) | 1.984**<br>(0.843)  |
| day -28 | 2.452***<br>(0.689) | 1.944***<br>(0.654) |
| day -27 | 2.351**<br>(0.930)  | 1.724**<br>(0.834)  |
| day -26 | 2.204**<br>(1.024)  | 1.605<br>(0.961)    |
| day -25 | 2.238**<br>(1.085)  | 1.672<br>(1.062)    |
| day -24 | 1.715<br>(1.142)    | 1.048<br>(1.019)    |
| day -23 | 1.756<br>(1.844)    | 1.225<br>(1.740)    |
| day -22 | 2.594<br>(1.671)    | 2.134<br>(1.625)    |
| day -21 | 2.802**<br>(1.383)  | 2.316*<br>(1.369)   |
| day -20 | 3.124**<br>(1.354)  | 2.720**<br>(1.325)  |

---

|         |                     |                     |
|---------|---------------------|---------------------|
| day -19 | 2.607*<br>(1.424)   | 2.201<br>(1.388)    |
| day -18 | 2.795**<br>(1.256)  | 2.439**<br>(1.193)  |
| day -17 | 2.553**<br>(0.978)  | 2.308**<br>(0.918)  |
| day -16 | 2.348**<br>(0.988)  | 2.195**<br>(0.938)  |
| day -15 | 1.992***<br>(0.724) | 1.767***<br>(0.630) |
| day -14 | 2.116***<br>(0.757) | 1.974***<br>(0.639) |
| day -13 | 1.881**<br>(0.785)  | 1.669**<br>(0.726)  |
| day -12 | 1.586**<br>(0.686)  | 1.362**<br>(0.640)  |
| day -11 | 1.500*<br>(0.869)   | 1.207<br>(0.757)    |
| day -10 | 1.686**<br>(0.816)  | 1.299*<br>(0.704)   |
| day -9  | 2.419**<br>(1.132)  | 2.160**<br>(0.978)  |
| day -8  | 2.543**<br>(1.163)  | 2.272**<br>(1.018)  |
| day -7  | 1.940*<br>(1.060)   | 1.796*<br>(0.942)   |
| day -6  | 2.109*<br>(1.204)   | 1.948*<br>(1.064)   |
| day -5  | 2.424<br>(1.460)    | 2.247*<br>(1.269)   |

---



|        |                    |                    |
|--------|--------------------|--------------------|
| day -4 | 2.376*<br>(1.253)  | 2.186**<br>(1.058) |
| day -3 | 0.430<br>(1.203)   | 0.218<br>(1.137)   |
| day -2 | 0.723<br>(1.155)   | 0.507<br>(1.133)   |
| day -1 | 1.064<br>(0.818)   | 0.789<br>(0.784)   |
| day 1  | 1.323*<br>(0.762)  | 0.988<br>(0.699)   |
| day 2  | 1.728*<br>(0.920)  | 1.413<br>(0.900)   |
| day 3  | 1.763**<br>(0.808) | 1.468*<br>(0.773)  |
| day 4  | 1.366<br>(1.049)   | 0.969<br>(0.923)   |
| day 5  | 1.135<br>(1.068)   | 0.779<br>(0.965)   |
| day 6  | 0.729<br>(1.373)   | 0.358<br>(1.251)   |
| day 7  | 0.718<br>(1.460)   | 0.371<br>(1.363)   |
| day 8  | 0.137<br>(1.131)   | -0.238<br>(1.042)  |
| day 9  | -0.354<br>(1.272)  | -0.775<br>(1.171)  |
| day 10 | 0.035<br>(1.416)   | -0.403<br>(1.301)  |
| day 11 | -0.088<br>(1.154)  | -0.536<br>(1.042)  |
| day 12 | -0.052             | -0.471             |

---

|        |                   |                   |
|--------|-------------------|-------------------|
|        | (1.355)           | (1.218)           |
| day 13 | 0.482<br>(1.096)  | 0.009<br>(0.899)  |
| day 14 | 0.188<br>(0.920)  | -0.275<br>(0.774) |
| day 15 | 0.695<br>(1.319)  | 0.247<br>(1.105)  |
| day 16 | 0.044<br>(1.121)  | -0.449<br>(0.903) |
| day 17 | -0.467<br>(1.109) | -0.982<br>(0.898) |
| day 18 | -0.718<br>(1.089) | -1.240<br>(0.854) |
| day 19 | -0.107<br>(1.344) | -0.535<br>(1.119) |
| day 20 | -0.628<br>(1.028) | -1.071<br>(0.794) |
| day 21 | -0.169<br>(1.244) | -0.658<br>(1.005) |
| day 22 | -0.039<br>(1.384) | -0.572<br>(1.171) |
| day 23 | -0.317<br>(1.248) | -0.825<br>(1.052) |
| day 24 | 0.347<br>(1.519)  | -0.198<br>(1.331) |
| day 25 | 0.319<br>(1.193)  | -0.262<br>(1.010) |
| day 26 | 0.111<br>(0.988)  | -0.315<br>(0.874) |
| day 27 | -0.455<br>(0.789) | -0.972<br>(0.677) |

---

|        |                      |                      |
|--------|----------------------|----------------------|
| day 28 | -1.312*<br>(0.726)   | -1.930**<br>(0.734)  |
| day 29 | -0.766<br>(0.828)    | -1.266<br>(0.945)    |
| day 30 | -0.509<br>(0.576)    | -0.997<br>(0.619)    |
| day 31 | -1.454***<br>(0.466) | -1.887***<br>(0.374) |
| day 32 | -2.217***<br>(0.757) | -2.688***<br>(0.683) |
| day 33 | -1.526<br>(0.920)    | -1.927**<br>(0.853)  |
| day 34 | -1.824***<br>(0.653) | -2.235***<br>(0.475) |
| day 35 | -2.050***<br>(0.573) | -2.489***<br>(0.460) |
| day 36 | -2.507***<br>(0.875) | -2.970***<br>(0.787) |
| day 37 | -2.228**<br>(0.967)  | -2.661***<br>(0.987) |
| day 38 | -2.286*<br>(1.233)   | -2.760**<br>(1.237)  |
| day 39 | -2.673*<br>(1.483)   | -3.203**<br>(1.505)  |
| day 40 | -2.001<br>(1.416)    | -2.401*<br>(1.358)   |
| day 41 | -2.209<br>(1.435)    | -2.683*<br>(1.413)   |
| day 42 | -1.683<br>(1.183)    | -2.173*<br>(1.129)   |

---

|        |                    |                     |
|--------|--------------------|---------------------|
| day 43 | -1.577<br>(1.264)  | -2.056*<br>(1.217)  |
| day 44 | -1.509<br>(0.984)  | -1.994**<br>(0.929) |
| day 45 | -1.907*<br>(1.087) | -2.382**<br>(1.047) |

---

|                         |                    |                    |
|-------------------------|--------------------|--------------------|
| Observations            | 10,398             | 10,398             |
| R <sup>2</sup>          | 0.945              | 0.943              |
| Adjusted R <sup>2</sup> | 0.943              | 0.941              |
| Residual Std. Error     | 1.637 (df = 10036) | 1.670 (df = 10040) |

---

*Note:*

\*p<0.1; \*\*p<0.05; \*\*\*p<0.01

**S16 Table. Regression table.** Regression statistics of mask adherence on confirmed new cases (1) and deaths (2)

|                              | <i>Dependent variable:</i>  |                         |
|------------------------------|-----------------------------|-------------------------|
|                              | confirmed cases             | deaths                  |
|                              | (1)                         | (2)                     |
| compliance                   | -1.675***<br>(0.064)        | -0.017***<br>(0.001)    |
| new test rate                | 1,528.504***<br>(108.597)   | 14.615***<br>(1.225)    |
| precipitation                | -0.419***<br>(0.056)        | -0.003***<br>(0.001)    |
| temperature                  | -1.060***<br>(0.058)        | -0.004***<br>(0.001)    |
| grocery and pharmacy         | 0.453***<br>(0.066)         | 0.002***<br>(0.001)     |
| parks                        | -0.170***<br>(0.016)        | -0.002***<br>(0.0002)   |
| transit stations             | -0.237***<br>(0.043)        | -0.005***<br>(0.0005)   |
| workplaces                   | 2.261***<br>(0.158)         | 0.015***<br>(0.002)     |
| residential                  | 5.755***<br>(0.420)         | 0.021***<br>(0.005)     |
| grocery and pharmacy square  | 0.008***<br>(0.002)         | 0.0002***<br>(0.00003)  |
| retail and recreation square | 0.0002<br>(0.001)           | -0.00002<br>(0.00002)   |
| parks square                 | 0.0004***<br>(0.0001)       | 0.00000***<br>(0.00000) |
| transit stations square      | -0.013***<br>(0.001)        | -0.0002***<br>(0.00001) |
| workplaces square            | 0.017***<br>(0.003)         | 0.0001***<br>(0.00003)  |
| residential square           | -0.012<br>(0.025)           | 0.001***<br>(0.0003)    |
| Constant                     | 191.442***<br>(5.384)       | 1.874***<br>(0.061)     |
| Observations                 | 3,841                       | 3,841                   |
| R <sup>2</sup>               | 0.502                       | 0.343                   |
| <i>Note:</i>                 | *p<0.1; **p<0.05; ***p<0.01 |                         |

**S17 Table. Regression table.** Multi-linear survey regression statistics of community mask adherence and community mask attitudes on COVID-19 Deaths and Cases in 69 countries over all waves.

|                          | <i>Dependent variable:</i> |                       |                           |                       |
|--------------------------|----------------------------|-----------------------|---------------------------|-----------------------|
|                          | Cases                      | Deaths                | Cases                     | Deaths                |
|                          | (1)                        | (2)                   | (3)                       | (4)                   |
| Community Mask Attitudes | -0.605***<br>(0.110)       | -0.035***<br>(0.003)  |                           |                       |
| Community Mask Adherence |                            |                       | -0.560***<br>(0.121)      | -0.036***<br>(0.003)  |
| population density       | -0.946***<br>(0.021)       | -0.023***<br>(0.001)  | -0.949***<br>(0.021)      | -0.023***<br>(0.001)  |
| human development index  | 5,157.998***<br>(47.140)   | 115.327***<br>(1.120) | 5,169.927***<br>(47.192)  | 116.117***<br>(1.126) |
| new tests                | 34.811***<br>(1.709)       | 0.867***<br>(0.031)   | 34.662***<br>(1.710)      | 0.854***<br>(0.031)   |
| retail and recreation    | -21.700***<br>(0.380)      | -0.233***<br>(0.007)  | -21.658***<br>(0.379)     | -0.230***<br>(0.007)  |
| grocery and pharmacy     | -1.225***<br>(0.365)       | -0.347***<br>(0.009)  | -1.289***<br>(0.362)      | -0.351***<br>(0.008)  |
| parks                    | -0.097<br>(0.299)          | -0.123***<br>(0.006)  | -0.041<br>(0.299)         | -0.119***<br>(0.006)  |
| transit stations         | 30.281***<br>(0.320)       | 0.761***<br>(0.007)   | 30.335***<br>(0.320)      | 0.762***<br>(0.007)   |
| workplaces               | -2.403***<br>(0.333)       | -0.038***<br>(0.009)  | -2.482***<br>(0.327)      | -0.043***<br>(0.009)  |
| residential              | -5.306***<br>(0.770)       | 0.217***<br>(0.016)   | -5.206***<br>(0.771)      | 0.222***<br>(0.016)   |
| Constant                 | -2,844.272***<br>(39.495)  | -54.236***<br>(0.935) | -2,855.701***<br>(39.213) | -54.736***<br>(0.919) |
| Observations             | 39,345                     | 39,345                | 39,345                    | 39,345                |

*Note:*

\*p<0.1; \*\*p<0.05; \*\*\*p<0.01



**S21 Table. Regression table.** Multi-linear survey regression statistics of community mask attitudes on COVID-19 deaths in 69 countries per wave.

|                          | Dependent variable:  |                      |                      |                      |                      |                      |                      |                      |                      |                      |                      |                      |                      |                      |                      |                      |                      |                      |
|--------------------------|----------------------|----------------------|----------------------|----------------------|----------------------|----------------------|----------------------|----------------------|----------------------|----------------------|----------------------|----------------------|----------------------|----------------------|----------------------|----------------------|----------------------|----------------------|
|                          | new deaths           |                      |                      |                      |                      |                      |                      |                      |                      |                      |                      |                      |                      |                      |                      |                      |                      |                      |
|                          | (1)                  | (2)                  | (3)                  | (4)                  | (5)                  | (6)                  | (7)                  | (8)                  | (9)                  | (10)                 | (11)                 | (12)                 | (13)                 | (14)                 | (15)                 | (16)                 | (17)                 | (18)                 |
| Community Mask Attitudes | -0.004***<br>(0.001) | -0.004***<br>(0.004) | -0.005***<br>(0.005) | -0.004***<br>(0.005) | -0.003***<br>(0.004) | -0.004***<br>(0.005) | -0.004***<br>(0.003) | -0.003***<br>(0.003) | -0.003***<br>(0.003) | -0.003***<br>(0.004) | -0.003***<br>(0.005) | -0.006***<br>(0.001) | -0.007***<br>(0.004) | -0.005***<br>(0.001) | -0.005***<br>(0.005) | -0.004***<br>(0.004) | -0.004***<br>(0.004) | -0.003***<br>(0.003) |
| population density       | -0.002***<br>(0.000) | -0.002***<br>(0.001) | -0.002***<br>(0.001) | -0.002***<br>(0.001) | -0.002***<br>(0.001) | -0.002***<br>(0.001) | -0.002***<br>(0.001) | -0.001***<br>(0.000) | -0.001***<br>(0.000) | -0.001***<br>(0.000) | -0.001***<br>(0.000) | -0.001***<br>(0.001) | -0.001***<br>(0.001) | -0.001***<br>(0.001) | -0.001***<br>(0.001) | -0.001***<br>(0.001) | -0.002***<br>(0.001) | -0.002***<br>(0.001) |
| human development index  | 4.734***<br>(0.141)  | 5.483***<br>(0.154)  | 5.855***<br>(0.137)  | 5.761***<br>(0.168)  | 5.614***<br>(0.155)  | 7.302***<br>(0.246)  | 5.542***<br>(0.122)  | 5.407***<br>(0.089)  | 4.552***<br>(0.109)  | 3.085***<br>(0.158)  | 5.159***<br>(0.182)  | 11.863***<br>(0.208) | 13.140***<br>(0.198) | 14.529***<br>(0.201) | 8.466***<br>(0.132)  | 11.693***<br>(0.160) | 10.172***<br>(0.117) | 11.533***<br>(0.112) |
| new tests                | 0.253***<br>(0.024)  | 0.592***<br>(0.014)  | 0.508***<br>(0.015)  | 0.396***<br>(0.018)  | -0.215***<br>(0.016) | 0.160***<br>(0.016)  | 0.183***<br>(0.010)  | 0.321***<br>(0.007)  | 0.449***<br>(0.007)  | 0.444***<br>(0.009)  | 0.932***<br>(0.012)  | 0.830***<br>(0.011)  | 0.678***<br>(0.009)  | 0.866***<br>(0.009)  | 1.237***<br>(0.009)  | 0.935***<br>(0.008)  | 0.481***<br>(0.007)  | 0.687***<br>(0.003)  |
| retail and recreation    | -0.008***<br>(0.001) | 0.001<br>(0.001)     | -0.008***<br>(0.001) | -0.005***<br>(0.002) | -0.048***<br>(0.001) | -0.015***<br>(0.002) | -0.027***<br>(0.001) | -0.039***<br>(0.001) | -0.021***<br>(0.001) | -0.128***<br>(0.002) | -0.018***<br>(0.002) | -0.002<br>(0.002)    | -0.048***<br>(0.001) | -0.080***<br>(0.001) | -0.084***<br>(0.002) | -0.029***<br>(0.001) | -0.014***<br>(0.001) | -0.023***<br>(0.001) |
| grocery and pharmacy     | -0.010***<br>(0.001) | -0.008***<br>(0.001) | -0.001<br>(0.001)    | 0.011***<br>(0.002)  | 0.049***<br>(0.002)  | 0.089***<br>(0.002)  | -0.002***<br>(0.001) | -0.002***<br>(0.001) | -0.019***<br>(0.001) | -0.008***<br>(0.001) | -0.020***<br>(0.002) | 0.022***<br>(0.001)  | 0.017***<br>(0.001)  | -0.022***<br>(0.001) | -0.012***<br>(0.002) | -0.004***<br>(0.001) | -0.014***<br>(0.001) | -0.015***<br>(0.001) |
| parke                    | -0.009***<br>(0.000) | -0.014***<br>(0.003) | -0.013***<br>(0.003) | -0.016***<br>(0.004) | -0.005***<br>(0.004) | -0.018***<br>(0.004) | -0.020***<br>(0.004) | -0.022***<br>(0.004) | -0.020***<br>(0.001) | -0.046***<br>(0.001) | -0.047***<br>(0.001) | -0.038***<br>(0.001) | -0.015***<br>(0.001) | -0.008***<br>(0.002) | -0.006***<br>(0.002) | -0.022***<br>(0.001) | -0.009***<br>(0.001) | -0.012***<br>(0.001) |
| transit stations         | 0.009***<br>(0.001)  | 0.010***<br>(0.001)  | 0.015***<br>(0.001)  | 0.005***<br>(0.001)  | 0.008***<br>(0.001)  | 0.020***<br>(0.001)  | 0.019***<br>(0.001)  | 0.021***<br>(0.001)  | 0.010***<br>(0.001)  | 0.027***<br>(0.001)  | -0.013***<br>(0.002) | 0.026***<br>(0.001)  | 0.048***<br>(0.001)  | 0.012***<br>(0.001)  | 0.075***<br>(0.002)  | 0.077***<br>(0.001)  | 0.060***<br>(0.001)  | 0.076***<br>(0.001)  |
| workless                 | 0.023***<br>(0.002)  | 0.046***<br>(0.001)  | 0.015***<br>(0.001)  | 0.013***<br>(0.001)  | -0.014***<br>(0.001) | 0.014***<br>(0.001)  | 0.028***<br>(0.001)  | 0.017***<br>(0.001)  | 0.013***<br>(0.001)  | 0.013***<br>(0.001)  | 0.040***<br>(0.002)  | -0.021***<br>(0.001) | -0.044***<br>(0.001) | -0.066***<br>(0.001) | -0.035***<br>(0.001) | 0.013***<br>(0.002)  | -0.008***<br>(0.001) | -0.004***<br>(0.001) |
| residential              | 0.086***<br>(0.005)  | 0.079***<br>(0.004)  | 0.099***<br>(0.004)  | 0.121***<br>(0.004)  | 0.049***<br>(0.004)  | 0.097***<br>(0.004)  | 0.052***<br>(0.003)  | 0.005<br>(0.003)     | 0.036***<br>(0.003)  | -0.042***<br>(0.004) | 0.039***<br>(0.005)  | 0.002<br>(0.004)     | -0.080***<br>(0.004) | -0.096***<br>(0.003) | -0.110***<br>(0.003) | 0.022***<br>(0.002)  | 0.015***<br>(0.002)  | 0.022***<br>(0.002)  |
| Constant                 | -2.317***<br>(0.001) | -2.520***<br>(0.001) | -2.804***<br>(0.005) | -3.281***<br>(0.117) | -3.517***<br>(0.117) | -4.109***<br>(0.171) | -3.071***<br>(0.094) | -3.019***<br>(0.069) | -2.466***<br>(0.084) | -6.018***<br>(0.139) | -3.017***<br>(0.130) | -7.418***<br>(0.146) | -8.364***<br>(0.140) | -8.200***<br>(0.117) | -4.200***<br>(0.116) | -4.521***<br>(0.130) | -4.552***<br>(0.092) | -5.421***<br>(0.091) |
| Observations             | 26,707               | 12,941               | 29,491               | 23,816               | 22,067               | 17,195               | 40,071               | 37,862               | 36,959               | 36,774               | 41,825               | 38,405               | 42,088               | 39,348               | 38,176               | 39,478               | 39,127               | 39,345               |

Note: \*\*\*p<0.01, \*\*p<0.05, \*p<0.01
